# Supplementary material for: Optimizing open data to support one health: best practices to ensure interoperability of genomic data from bacterial pathogens
Source: One Health Outlook. 2020 Oct 19;2:20. doi: 10.1186/s42522-020-00026-3 (PMC7568946; doi:10.1186/s42522-020-00026-3)
Supplement: Supplementary file 1 — Additional file 1. SRA accessions for 10,000 random isolates sampled from NCBI Pathogen Detection for S. enterica, L. monocytogenes, E. coli, Shigella sp., C. jejune, and V. parahaemolyticus (1400 due to smaller database). [file 42522_2020_26_MOESM1_ESM.csv]

Organism	SRA_Accession	Number_of_Contigs_SKESA	Length_Assembly_SKESA	Coverage_SKESA	N50_SKESA
Campylobacter	SRR10000864	35	1661930	110.5	179536
Campylobacter	SRR10000944	88	1697057	184.9	67718
Campylobacter	SRR10000953	32	1597768	181.6	185493
Campylobacter	SRR10001172	169	1663996	194.6	16359
Campylobacter	SRR10001176	34	1629418	146	197340
Campylobacter	SRR10001179	100	1744042	186.7	58027
Campylobacter	SRR10001185	46	1659296	175.7	98716
Campylobacter	SRR10001186	65	1642725	223.1	65491
Campylobacter	SRR10001187	52	1615111	186.2	87250
Campylobacter	SRR10001192	64	1586998	146.1	68272
Campylobacter	SRR10001194	133	1621088	136	23922
Campylobacter	SRR10001197	98	1750522	124	138801
Campylobacter	SRR10001203	46	1639083	209.1	109512
Campylobacter	SRR10001207	43	1645175	216.5	89420
Campylobacter	SRR10001278	188	1615061	198.8	17811
Campylobacter	SRR10001290	36	1593979	194.4	87901
Campylobacter	SRR10001295	83	1743296	153	103180
Campylobacter	SRR10001296	43	1595292	219.2	87088
Campylobacter	SRR10001299	2684	2739891	107.9	17239
Campylobacter	SRR10001305	76	1716870	143.2	101058
Campylobacter	SRR10001316	53	1616658	134.7	104079
Campylobacter	SRR10001318	58	1726377	221.1	68194
Campylobacter	SRR10001391	65	1646955	229.5	78637
Campylobacter	SRR10001405	99	1714346	173.1	91710
Campylobacter	SRR10001453	92	1703172	238.3	101280
Campylobacter	SRR10001475	109	1713082	240.6	74150
Campylobacter	SRR10002125	102	1680882	152.8	38890
Campylobacter	SRR10002126	252	1745858	127.9	13956
Campylobacter	SRR10002128	557	1735279	170.1	9243
Campylobacter	SRR10002129	71	1700691	143.7	78846
Campylobacter	SRR10002151	63	1643891	198	78486
Campylobacter	SRR10002153	93	1725732	176.4	60135
Campylobacter	SRR10002155	76	1604862	115.7	56013
Campylobacter	SRR10002169	50	1639368	158.3	80631
Campylobacter	SRR10002170	157	1703413	180	25268
Campylobacter	SRR10002174	39	1553790	174.1	149496
Campylobacter	SRR10002189	57	1734144	114.1	128489
Campylobacter	SRR10002192	74	1697838	201.4	78485
Campylobacter	SRR10002228	44	1675173	173.2	150006
Campylobacter	SRR10002231	311	1687054	114	10028
Campylobacter	SRR10002247	109	1590539	221.7	30497
Campylobacter	SRR10002248	61	1643608	157.4	79862
Campylobacter	SRR10002252	257	1632380	155.5	12606
Campylobacter	SRR10002253	57	1649055	252.5	90168
Campylobacter	SRR10002270	57	1642960	135.8	70549
Campylobacter	SRR10002272	84	1773640	170.1	128335
Campylobacter	SRR10002275	44	1664443	201.9	150826
Campylobacter	SRR10002277	177	1640810	165.7	17336
Campylobacter	SRR10002280	28	1663680	193	162466
Campylobacter	SRR10002283	22	1649479	192.3	178177
Campylobacter	SRR10002286	152	1739229	158.7	42020
Campylobacter	SRR10002289	38	1596071	168.2	110650
Campylobacter	SRR10002296	81	1675070	136.9	122083
Campylobacter	SRR10002313	60	1682242	150.9	71505
Campylobacter	SRR10002317	79	1730846	273.6	67851
Campylobacter	SRR10002326	65	1692942	226.6	78490
Campylobacter	SRR10002328	53	1610649	156	80980
Campylobacter	SRR10002330	49	1603487	103.5	73152
Campylobacter	SRR10002357	66	1664615	156.9	128151
Campylobacter	SRR10002358	2808	3181423	101.5	9967
Campylobacter	SRR10002360	73	1641233	231.1	51859
Campylobacter	SRR10002367	122	1698442	194.2	40772
Campylobacter	SRR10002368	41	1647588	179.5	191642
Campylobacter	SRR10002369	61	1679146	142.7	127610
Campylobacter	SRR10002372	47	1718356	196.8	83714
Campylobacter	SRR10002375	141	1709440	198.9	41792
Campylobacter	SRR10002376	31	1596843	222.4	87667
Campylobacter	SRR10003373	106	1594847	81	33505
Campylobacter	SRR10003374	99	1642428	112.4	46574
Campylobacter	SRR10003415	111	1673790	83.3	45736
Campylobacter	SRR10003421	117	1685557	101.8	51906
Campylobacter	SRR10003433	59	1616387	162.7	79109
Campylobacter	SRR10003565	206	1742694	63.9	18814
Campylobacter	SRR10005242	40	1710784	92.5	129867
Campylobacter	SRR10005243	80	1750486	77.5	87588
Campylobacter	SRR10005249	50	1715191	84.8	105368
Campylobacter	SRR10005396	21	1610464	219.8	175388
Campylobacter	SRR10005428	25	1658991	132.6	139760
Campylobacter	SRR10005435	45	1701296	142.4	145508
Campylobacter	SRR10005556	178	1765448	84.1	37607
Campylobacter	SRR10005557	63	1648820	86.3	60880
Campylobacter	SRR10005561	56	1724703	104.2	55212
Campylobacter	SRR10005582	130	1745556	84.2	36984
Campylobacter	SRR10006703	74	1725879	146.4	64968
Campylobacter	SRR10006726	102	1626354	145.6	43149
Campylobacter	SRR10006799	45	1681810	197.8	149456
Campylobacter	SRR10006802	68	1726863	199.8	93129
Campylobacter	SRR10006819	80	1681913	190.1	65452
Campylobacter	SRR10006820	107	1799823	190.5	80815
Campylobacter	SRR10006821	43	1675314	186.1	137748
Campylobacter	SRR10006824	87	1669852	196.6	65757
Campylobacter	SRR10006828	110	1631128	157.7	30980
Campylobacter	SRR10006830	134	1675010	211.9	27801
Campylobacter	SRR10006832	51	1636662	130.9	122462
Campylobacter	SRR10006833	35	1650619	207.8	131206
Campylobacter	SRR10006834	51	1675930	182.4	128860
Campylobacter	SRR10006837	55	1696381	219	132022
Campylobacter	SRR10006838	93	1688881	136	44935
Campylobacter	SRR10006839	45	1638711	177	117940
Campylobacter	SRR10006842	65	1726763	156.2	98725
Campylobacter	SRR10006843	83	1631692	224.4	58204
Campylobacter	SRR10006845	79	1699095	129.1	75746
Campylobacter	SRR10006865	137	1738190	233.9	110854
Campylobacter	SRR10006872	87	1730884	227.9	71399
Campylobacter	SRR10006878	100	1707218	163.3	51529
Campylobacter	SRR10006884	96	1644168	212.5	41517
Campylobacter	SRR10006893	137	1613263	205.4	26704
Campylobacter	SRR10006900	65	1683036	255.8	79314
Campylobacter	SRR10006918	49	1727727	147.7	172573
Campylobacter	SRR10006934	99	1668509	236	34571
Campylobacter	SRR10007603	36	1613547	119.6	154328
Campylobacter	SRR10008452	58	1747482	72.1	97050
Campylobacter	SRR10008484	19	1682590	145.4	184887
Campylobacter	SRR10010264	41	1660361	83.4	161624
Campylobacter	SRR10010413	122	1782882	109.2	72253
Campylobacter	SRR10010852	33	1635454	86.3	184827
Campylobacter	SRR10010863	45	1660606	147.4	105220
Campylobacter	SRR10010866	71	1750969	115.3	134240
Campylobacter	SRR10010873	40	1684802	78.7	139468
Campylobacter	SRR10011092	79	1706874	143.1	58964
Campylobacter	SRR10011097	47	1654417	184.7	86192
Campylobacter	SRR10011100	72	1699550	198.4	103291
Campylobacter	SRR10011107	35	1642694	192.9	173019
Campylobacter	SRR10011118	162	1723163	172.7	29194
Campylobacter	SRR10011121	50	1676131	177.3	97985
Campylobacter	SRR10011122	51	1644379	190.5	108795
Campylobacter	SRR10011124	41	1602424	230.9	181173
Campylobacter	SRR10011128	130	1696976	192.5	71238
Campylobacter	SRR10011130	57	1690808	177.2	138662
Campylobacter	SRR10011134	77	1698068	155.8	92457
Campylobacter	SRR10011139	94	1691664	116	98347
Campylobacter	SRR10011146	80	1664339	213.7	84678
Campylobacter	SRR10011155	52	1670076	138.4	102681
Campylobacter	SRR10011159	49	1651980	231	102202
Campylobacter	SRR10011166	51	1640908	223.5	84368
Campylobacter	SRR10011170	45	1644042	148.6	108572
Campylobacter	SRR10011173	57	1693453	185.1	78429
Campylobacter	SRR10011174	62	1639330	191.4	71002
Campylobacter	SRR10011177	46	1643908	187.9	128601
Campylobacter	SRR10011187	60	1636115	152.7	78274
Campylobacter	SRR10011206	68	1687661	191	85051
Campylobacter	SRR10011213	49	1635070	156.6	113917
Campylobacter	SRR10011217	156	1669773	201	33808
Campylobacter	SRR10011234	62	1711748	219	119034
Campylobacter	SRR10011258	132	1733886	212.4	35399
Campylobacter	SRR10011262	24	1650534	213.3	178158
Campylobacter	SRR10011267	76	1652125	295.4	62808
Campylobacter	SRR10011269	49	1644985	141.2	102244
Campylobacter	SRR10011272	50	1682679	249.2	101177
Campylobacter	SRR10011273	45	1671581	239.2	144270
Campylobacter	SRR10011276	50	1649113	242.3	90168
Campylobacter	SRR10011279	57	1655614	260.2	161111
Campylobacter	SRR10011290	138	1719121	146.6	49805
Campylobacter	SRR10011301	74	1712421	162.1	72289
Campylobacter	SRR10011310	69	1723745	220.9	128355
Campylobacter	SRR10011314	56	1624942	202.2	103323
Campylobacter	SRR10011320	54	1645440	206.7	89037
Campylobacter	SRR10011327	53	1619890	195.7	90670
Campylobacter	SRR10011328	87	1741788	127.7	101743
Campylobacter	SRR10011340	50	1605217	219.4	83889
Campylobacter	SRR10011347	70	1701600	186.6	112729
Campylobacter	SRR10011351	62	1654192	168.2	97368
Campylobacter	SRR10011352	51	1669744	198.7	90153
Campylobacter	SRR10011358	73	1692109	224.5	101634
Campylobacter	SRR10011360	93	1710541	352.1	69040
Campylobacter	SRR10011361	83	1715146	154.2	69029
Campylobacter	SRR10011363	41	1654672	159.4	164104
Campylobacter	SRR10011373	63	1616708	183.9	62616
Campylobacter	SRR10011374	70	1731087	140.1	79014
Campylobacter	SRR10011386	46	1698955	186.9	128332
Campylobacter	SRR10011388	109	1681127	173	31956
Campylobacter	SRR10011392	103	1706932	234	41012
Campylobacter	SRR10011396	50	1715686	151.4	116701
Campylobacter	SRR10011400	72	1699338	142.2	102411
Campylobacter	SRR10011408	49	1734641	188.9	104108
Campylobacter	SRR10011416	58	1646761	178.5	79567
Campylobacter	SRR10011417	68	1635241	136.9	54001
Campylobacter	SRR10011420	87	1696569	191.4	43888
Campylobacter	SRR10011422	74	1711460	200	101973
Campylobacter	SRR10011424	69	1633640	257.4	61781
Campylobacter	SRR10011436	94	1625613	236.6	42674
Campylobacter	SRR10011441	45	1633476	243.9	128655
Campylobacter	SRR10013013	44	1619882	112.5	115335
Campylobacter	SRR10013346	66	1683351	137.9	55284
Campylobacter	SRR10013357	154	1635823	121.6	23102
Campylobacter	SRR10013369	79	1641063	248	50332
Campylobacter	SRR10013379	74	1649593	198.7	44620
Campylobacter	SRR10013386	61	1725829	90.8	104079
Campylobacter	SRR10013411	50	1679912	170.3	131982
Campylobacter	SRR10013414	50	1643190	139.1	124824
Campylobacter	SRR10013417	39	1634939	196.4	189938
Campylobacter	SRR10013418	64	1697849	198.8	121220
Campylobacter	SRR10013423	73	1729769	165.5	95482
Campylobacter	SRR10013430	473	1833789	91	18356
Campylobacter	SRR10013436	79	1643495	179.3	51832
Campylobacter	SRR10013437	160	1779508	172.8	60969
Campylobacter	SRR10013446	137	1708979	173.9	82795
Campylobacter	SRR10013456	97	1727866	174.3	50362
Campylobacter	SRR10013457	94	1724406	203.2	90287
Campylobacter	SRR10013460	36	1659734	235.8	153933
Campylobacter	SRR10013461	137	1708294	125	22203
Campylobacter	SRR10013462	83	1641529	112.3	51837
Campylobacter	SRR10013466	43	1589231	197.9	116454
Campylobacter	SRR10013469	57	1604294	140.2	65398
Campylobacter	SRR10013470	128	1820749	192.1	135808
Campylobacter	SRR10013472	63	1643731	135.8	68867
Campylobacter	SRR10013489	51	1694997	202.2	100160
Campylobacter	SRR10013490	76	1689863	211.9	48542
Campylobacter	SRR10013505	47	1661280	204.8	106717
Campylobacter	SRR10013510	88	1851107	182.5	89421
Campylobacter	SRR10013514	85	1699069	284.4	63992
Campylobacter	SRR10013531	105	1735570	185.7	56773
Campylobacter	SRR10013655	93	1695861	348.6	56050
Campylobacter	SRR10013660	131	1853744	185.4	42631
Campylobacter	SRR10013673	53	1610458	129.3	134577
Campylobacter	SRR10013676	62	1699884	249.8	71741
Campylobacter	SRR10013682	99	1786107	197.8	135823
Campylobacter	SRR10013684	80	1713678	245.5	90764
Campylobacter	SRR10013686	56	1602070	132.5	115860
Campylobacter	SRR10013687	71	1601446	159.6	57431
Campylobacter	SRR10013689	34	1651422	207	129267
Campylobacter	SRR10013690	80	1643073	223.3	47487
Campylobacter	SRR10013767	45	1645918	189.8	104761
Campylobacter	SRR10013770	82	1697551	182.9	92456
Campylobacter	SRR10013772	91	1712158	91.8	47322
Campylobacter	SRR10013774	76	1634936	156.4	53933
Campylobacter	SRR10013778	98	1726937	140.7	103168
Campylobacter	SRR10013785	107	1694115	180.3	38082
Campylobacter	SRR10013791	96	1637003	246.8	76747
Campylobacter	SRR10013793	64	1660497	131.7	82884
Campylobacter	SRR10013797	108	1647987	128.3	34730
Campylobacter	SRR10013799	44	1660496	259.5	153933
Campylobacter	SRR10013848	80	1624199	117.3	55306
Campylobacter	SRR10013852	47	1676191	197.6	105426
Campylobacter	SRR10013854	79	1718962	197.8	128588
Campylobacter	SRR10013869	84	1693969	178.7	74676
Campylobacter	SRR10013937	95	1695001	115.4	62833
Campylobacter	SRR10013960	53	1552669	255.1	79283
Campylobacter	SRR10013963	115	1754276	158.8	78658
Campylobacter	SRR10013966	32	1591379	177.8	183960
Campylobacter	SRR10013985	56	1660397	175.4	80646
Campylobacter	SRR10013989	48	1624913	343.1	99597
Campylobacter	SRR10013992	88	1671904	193.5	51864
Campylobacter	SRR10013993	42	1662773	197.9	129912
Campylobacter	SRR10014004	103	1753665	257	35549
Campylobacter	SRR10014007	35	1628940	112.8	132619
Campylobacter	SRR10014015	111	1725816	214.1	51849
Campylobacter	SRR10016020	39	1764593	79	114366
Campylobacter	SRR10016024	60	1757935	72	154657
Campylobacter	SRR10016026	40	1730803	84.4	109087
Campylobacter	SRR10016421	54	1613183	68.5	81290
Campylobacter	SRR10016827	77	1772616	56.3	98916
Campylobacter	SRR10018080	44	1652550	209.6	163375
Campylobacter	SRR10018163	62	1742701	163.7	92501
Campylobacter	SRR10018178	132	1776107	134.2	43819
Campylobacter	SRR10018209	127	1788712	244.7	85083
Campylobacter	SRR10018229	48	1606912	113	128981
Campylobacter	SRR10018235	78	1601327	265.7	43639
Campylobacter	SRR10018257	94	1719865	158.7	62100
Campylobacter	SRR10018296	52	1695371	106.5	100093
Campylobacter	SRR10018303	210	1907504	251.3	44631
Campylobacter	SRR10018313	157	1912449	212.5	57285
Campylobacter	SRR10018318	94	1686574	104.5	56647
Campylobacter	SRR10018330	36	1622569	172.6	138131
Campylobacter	SRR10018341	55	1697390	174.1	102749
Campylobacter	SRR10018518	213	1719635	69.7	20169
Campylobacter	SRR10018914	101	1733459	118.4	67364
Campylobacter	SRR10018923	52	1707675	231.7	67799
Campylobacter	SRR10018924	72	1760277	226.6	111348
Campylobacter	SRR10018988	111	1700541	177.2	33140
Campylobacter	SRR10019001	49	1646409	265.4	128602
Campylobacter	SRR10019003	42	1701396	166.2	148090
Campylobacter	SRR10019004	103	1738742	204.4	78861
Campylobacter	SRR10019008	70	1707051	118.3	76668
Campylobacter	SRR10019040	105	1734444	218.7	71297
Campylobacter	SRR10019044	107	1714515	205.5	91750
Campylobacter	SRR10019051	36	1674362	226.3	163527
Campylobacter	SRR10019053	69	1674133	121.2	65904
Campylobacter	SRR10019059	98	1702182	277.6	71673
Campylobacter	SRR10019060	212	1593430	198.2	16463
Campylobacter	SRR10019068	141	1629063	228.7	27569
Campylobacter	SRR10019125	101	1644217	148.4	34954
Campylobacter	SRR10019127	107	1681480	257.4	32570
Campylobacter	SRR10019130	30	1579673	258.5	129268
Campylobacter	SRR10019137	151	1635811	160.9	23838
Campylobacter	SRR10019138	120	1693528	182.9	34728
Campylobacter	SRR10019140	108	1794999	230.4	135895
Campylobacter	SRR10019142	88	1686706	235.5	74307
Campylobacter	SRR10019153	45	1603818	176.5	134552
Campylobacter	SRR10019154	48	1619452	216.1	75807
Campylobacter	SRR10019155	50	1652664	302.2	99788
Campylobacter	SRR10019156	55	1792867	227.7	83174
Campylobacter	SRR10019159	40	1622351	210.1	112342
Campylobacter	SRR10019163	82	1663904	173.9	78471
Campylobacter	SRR10019302	45	1632329	116.1	128640
Campylobacter	SRR10019355	140	1654247	155	26330
Campylobacter	SRR10019365	70	1680703	121.2	65643
Campylobacter	SRR10019864	47	1651155	213.1	82637
Campylobacter	SRR10020001	54	1587344	279.4	66527
Campylobacter	SRR10020034	92	1667647	322.2	42879
Campylobacter	SRR10020123	55	1677771	264.8	73717
Campylobacter	SRR10020140	32	1664425	272.6	127772
Campylobacter	SRR10022797	188	1799351	172.7	78717
Campylobacter	SRR10023751	96	1635936	213.9	34784
Campylobacter	SRR10023759	73	1697919	214.5	57346
Campylobacter	SRR10023779	46	1632609	194.4	127584
Campylobacter	SRR10023780	140	1836067	176.8	47482
Campylobacter	SRR10023781	94	1708584	199.3	51849
Campylobacter	SRR10024867	32	1692002	67.2	158899
Campylobacter	SRR10026081	91	1687757	165.1	48827
Campylobacter	SRR10026082	118	1733528	241.2	51937
Campylobacter	SRR10026088	127	1767317	85.6	129869
Campylobacter	SRR10026100	96	1719511	153.4	49592
Campylobacter	SRR10026101	47	1703867	102	138596
Campylobacter	SRR10026102	51	1678528	107.8	122409
Campylobacter	SRR10026107	82	1645909	103.3	45533
Campylobacter	SRR10026114	117	1650976	147.2	42177
Campylobacter	SRR10026117	49	1724596	120.5	88857
Campylobacter	SRR10026119	66	1670621	86.6	79030
Campylobacter	SRR10026124	104	1686326	168.3	35943
Campylobacter	SRR10026125	71	1700992	112.9	88382
Campylobacter	SRR10026132	98	1583380	118.7	29913
Campylobacter	SRR10026138	109	1800714	94.2	122546
Campylobacter	SRR10026143	37	1645538	105	149950
Campylobacter	SRR10026147	140	1783926	150.2	86973
Campylobacter	SRR10026153	39	1606872	142.7	155940
Campylobacter	SRR10026154	64	1709574	95.6	136603
Campylobacter	SRR10026157	113	1829874	118.2	108392
Campylobacter	SRR10026160	24	1679990	114.8	155061
Campylobacter	SRR10026164	121	1668763	132.8	39892
Campylobacter	SRR10026166	48	1649142	177.7	82600
Campylobacter	SRR10026170	69	1699640	130.9	109423
Campylobacter	SRR10026177	48	1643590	221.2	108554
Campylobacter	SRR10026181	71	1697986	169.6	128404
Campylobacter	SRR10026183	139	1775641	175.4	80540
Campylobacter	SRR10026189	74	1657660	156.8	109417
Campylobacter	SRR10026194	119	1844242	178.1	130000
Campylobacter	SRR10026206	116	1667021	158.6	37395
Campylobacter	SRR10026207	68	1701472	170.7	112730
Campylobacter	SRR10026210	160	1688207	196.2	24994
Campylobacter	SRR10026216	82	1713826	186.7	74697
Campylobacter	SRR10026218	38	1596200	88	127584
Campylobacter	SRR10026228	117	1634205	91	30460
Campylobacter	SRR10026230	53	1609957	108.7	87064
Campylobacter	SRR10026237	146	1765303	153.9	31378
Campylobacter	SRR10026238	65	1630318	102.7	66423
Campylobacter	SRR10026243	89	1665451	137.2	38167
Campylobacter	SRR10026254	39	1678571	64	132387
Campylobacter	SRR10026291	166	1662560	143	26292
Campylobacter	SRR10026292	125	1742655	200.3	49078
Campylobacter	SRR10026294	83	1749542	112.6	61805
Campylobacter	SRR10026297	62	1734765	97.9	106211
Campylobacter	SRR10026300	37	1608845	116.4	191507
Campylobacter	SRR10026309	88	1678608	116	60704
Campylobacter	SRR10026325	176	1821454	180.6	40697
Campylobacter	SRR10026332	131	1805043	134.1	95204
Campylobacter	SRR10026337	145	1740034	192.7	30329
Campylobacter	SRR10026341	54	1596723	150.5	72547
Campylobacter	SRR10026350	159	1802840	210	58868
Campylobacter	SRR10026352	65	1576999	121.7	50886
Campylobacter	SRR10026355	151	1771890	154.5	53580
Campylobacter	SRR10026356	177	1751076	144.3	42399
Campylobacter	SRR10026359	72	1686936	197.4	66578
Campylobacter	SRR10026361	89	1726361	193.1	73089
Campylobacter	SRR10026397	49	1673236	96.4	90152
Campylobacter	SRR10026402	85	1768694	84.8	113795
Campylobacter	SRR10026404	31	1655137	89.9	117671
Campylobacter	SRR10026406	70	1701217	170.6	128405
Campylobacter	SRR10026410	85	1677203	162.9	86203
Campylobacter	SRR10026414	46	1642278	150.7	139880
Campylobacter	SRR10026417	55	1637992	160.7	88806
Campylobacter	SRR10026420	94	1697093	148.4	36700
Campylobacter	SRR10026423	63	1698239	110.7	128436
Campylobacter	SRR10026425	60	1676118	187.2	85507
Campylobacter	SRR10026426	178	1781119	142.7	50254
Campylobacter	SRR10026427	87	1644199	181	37697
Campylobacter	SRR10028512	94	1641257	68.2	29000
Campylobacter	SRR10029629	246	1731813	68.3	20335
Campylobacter	SRR10029644	104	1773537	60.6	67106
Campylobacter	SRR10029656	229	1647474	55.6	15296
Campylobacter	SRR10029812	136	1587574	62.9	21484
Campylobacter	SRR10029815	36	1637191	98	114124
Campylobacter	SRR10029816	69	1646066	86.2	64003
Campylobacter	SRR10029821	295	1549344	46.9	10009
Campylobacter	SRR10030019	71	1739167	71.4	79328
Campylobacter	SRR10031293	116	1870466	76	106768
Campylobacter	SRR10031314	204	1824455	124.5	26538
Campylobacter	SRR10031318	119	1591417	136.6	29474
Campylobacter	SRR10031319	135	1822485	119.3	76023
Campylobacter	SRR10031329	44	1610603	160.8	116075
Campylobacter	SRR10031338	31	1644356	114.6	122818
Campylobacter	SRR10031353	102	1727791	71.1	80196
Campylobacter	SRR10031364	75	1649173	160.1	54437
Campylobacter	SRR10031373	83	1703851	77.7	134996
Campylobacter	SRR10031375	43	1644273	95.9	82587
Campylobacter	SRR10031382	140	1630439	75.1	25065
Campylobacter	SRR10031388	69	1623027	62	69175
Campylobacter	SRR10031390	58	1711770	176.6	99349
Campylobacter	SRR10031402	59	1724832	172.8	78987
Campylobacter	SRR10031405	51	1647369	123.6	105067
Campylobacter	SRR10031409	45	1640719	142.7	100686
Campylobacter	SRR10031410	124	1681959	163.3	34698
Campylobacter	SRR10031411	64	1604874	198	73353
Campylobacter	SRR10031414	36	1588059	147.5	134035
Campylobacter	SRR10031418	74	1686342	198.9	51775
Campylobacter	SRR10031419	27	1649360	238.3	154891
Campylobacter	SRR10031421	47	1751789	127.7	170811
Campylobacter	SRR10031423	86	1655314	207.9	40744
Campylobacter	SRR10031428	75	1698870	152.3	99120
Campylobacter	SRR10031439	78	1708073	150.8	104054
Campylobacter	SRR10031440	81	1688505	161.8	55662
Campylobacter	SRR10031453	53	1696989	178.3	79553
Campylobacter	SRR10031455	52	1654635	147.7	128949
Campylobacter	SRR10031456	92	1741141	182.1	57252
Campylobacter	SRR10031462	60	1750223	193.5	86188
Campylobacter	SRR10031482	62	1617024	204	54307
Campylobacter	SRR10031483	148	1690173	136.8	30361
Campylobacter	SRR10031503	85	1693477	188.3	113109
Campylobacter	SRR10031506	39	1614011	227.7	86935
Campylobacter	SRR10031508	56	1624399	228.9	67260
Campylobacter	SRR10031510	62	1724364	105.7	79509
Campylobacter	SRR10031524	187	1721251	75.1	20310
Campylobacter	SRR10031526	116	1640286	145.6	29477
Campylobacter	SRR10031527	96	1751856	190.1	81706
Campylobacter	SRR10031528	55	1642636	108	62882
Campylobacter	SRR10031532	103	1718301	60.6	39846
Campylobacter	SRR10031553	47	1640104	163.3	169748
Campylobacter	SRR10031555	82	1701175	160.1	92456
Campylobacter	SRR10031557	131	1765760	103.9	112220
Campylobacter	SRR10031561	38	1624272	218.4	138136
Campylobacter	SRR10031565	59	1668032	83.2	66085
Campylobacter	SRR10031569	67	1744312	83	95619
Campylobacter	SRR10031570	132	1644969	105.6	29204
Campylobacter	SRR10031573	93	1728262	186.2	70312
Campylobacter	SRR10031576	73	1683332	57.4	76004
Campylobacter	SRR10031594	211	1644991	113.7	22985
Campylobacter	SRR10031599	58	1729613	139.2	111250
Campylobacter	SRR10031614	96	1677243	216.4	103515
Campylobacter	SRR10031622	43	1692343	223.1	89627
Campylobacter	SRR10031627	79	1602436	263.9	54914
Campylobacter	SRR10031629	57	1643879	127.5	102219
Campylobacter	SRR10032602	49	1607614	129.5	121159
Campylobacter	SRR10034747	29	1632656	101.1	113744
Campylobacter	SRR10034748	36	1686823	86.5	182536
Campylobacter	SRR10034750	31	1648679	87.6	182756
Campylobacter	SRR10035353	73	1717582	90.5	57432
Campylobacter	SRR10035839	53	1689679	31.8	111968
Campylobacter	SRR10036721	40	1604764	124.5	135046
Campylobacter	SRR10036723	44	1691885	109.2	163453
Campylobacter	SRR10036727	117	1719854	88.2	106719
Campylobacter	SRR10036729	57	1642363	90.8	130020
Campylobacter	SRR10036737	81	1711183	181.5	91809
Campylobacter	SRR10036738	72	1636803	174.5	61988
Campylobacter	SRR10036739	66	1658236	137.7	53923
Campylobacter	SRR10036741	47	1609678	154.8	108553
Campylobacter	SRR10036743	62	1809649	137.2	128609
Campylobacter	SRR10036750	64	1725050	49.9	58345
Campylobacter	SRR10036754	41	1661164	170.7	154854
Campylobacter	SRR10036755	64	1662392	129.3	108783
Campylobacter	SRR10036767	65	1712378	98.8	119076
Campylobacter	SRR10036772	92	1727109	101.2	91497
Campylobacter	SRR10036776	76	1699528	114.1	101180
Campylobacter	SRR10036779	28	1601448	118.9	134036
Campylobacter	SRR10036781	114	1800197	123.3	135992
Campylobacter	SRR10036786	66	1695646	116.1	109365
Campylobacter	SRR10036787	55	1694831	107.6	130131
Campylobacter	SRR10036803	58	1693562	198.5	102113
Campylobacter	SRR10036815	91	1734308	108.8	92398
Campylobacter	SRR10036821	146	1618783	128.9	24324
Campylobacter	SRR10036833	76	1666680	277.1	76276
Campylobacter	SRR10036835	62	1779440	108.6	104057
Campylobacter	SRR10036837	65	1752384	120	110765
Campylobacter	SRR10036838	70	1731758	107.6	121172
Campylobacter	SRR10036843	49	1675606	167.7	108797
Campylobacter	SRR10036844	82	1709702	135.1	55523
Campylobacter	SRR10036857	50	1655152	123	106396
Campylobacter	SRR10036864	72	1784335	172.8	115741
Campylobacter	SRR10036872	79	1736489	139.9	110137
Campylobacter	SRR10036873	49	1715869	159.5	127650
Campylobacter	SRR10036885	167	1769924	105.2	61118
Campylobacter	SRR10036891	63	1696995	182.6	81297
Campylobacter	SRR10036895	44	1649081	155.8	104045
Campylobacter	SRR10036898	47	1644873	156.6	108524
Campylobacter	SRR10036900	52	1729259	110.9	157429
Campylobacter	SRR10036905	119	1748051	110.2	135637
Campylobacter	SRR10036913	32	1607222	156.1	113074
Campylobacter	SRR10036922	136	1811378	120.5	113427
Campylobacter	SRR10036929	50	1649367	150.3	108786
Campylobacter	SRR10036934	46	1660509	179.7	105706
Campylobacter	SRR10036937	44	1654871	105.5	129041
Campylobacter	SRR10036941	39	1567247	156.9	149407
Campylobacter	SRR10036942	138	1686909	131.6	25093
Campylobacter	SRR10036953	33	1620148	134.7	115313
Campylobacter	SRR10036963	69	1693219	161.2	128087
Campylobacter	SRR10036993	181	1807314	127.2	38190
Campylobacter	SRR10036997	44	1635058	174.1	144270
Campylobacter	SRR10036999	69	1697687	174.4	115041
Campylobacter	SRR10037008	85	1620110	124.9	49345
Campylobacter	SRR10037029	87	1656180	112.2	46158
Campylobacter	SRR10037030	188	1634833	87.9	18559
Campylobacter	SRR10037624	60	1578946	193.1	53368
Campylobacter	SRR10037625	58	1712512	151.2	138581
Campylobacter	SRR10037821	53	1635084	195.3	129974
Campylobacter	SRR10037857	48	1633933	163.5	128642
Campylobacter	SRR10037860	124	1745853	207.6	83897
Campylobacter	SRR10037867	69	1709022	231	91351
Campylobacter	SRR10037870	73	1696204	161.2	128405
Campylobacter	SRR10037871	152	1833189	171.6	44076
Campylobacter	SRR10037877	67	1736583	170.7	128406
Campylobacter	SRR10037884	90	1669292	246	65056
Campylobacter	SRR10037889	141	1803698	208	110839
Campylobacter	SRR10037899	37	1609571	149.3	119229
Campylobacter	SRR10037907	52	1645060	392.3	102160
Campylobacter	SRR10037981	53	1741001	67.9	130316
Campylobacter	SRR10037982	47	1706761	67.2	167098
Campylobacter	SRR10037984	73	1773043	97	148461
Campylobacter	SRR10037990	43	1595641	68.8	117639
Campylobacter	SRR10038003	287	1845346	60.3	23201
Campylobacter	SRR10038004	186	1703460	51	19493
Campylobacter	SRR10038017	202	1727238	62.5	18593
Campylobacter	SRR10038021	143	1666559	72.6	24176
Campylobacter	SRR10038027	162	1859446	85.4	82165
Campylobacter	SRR10045156	51	1608152	50.8	140867
Campylobacter	SRR10045159	23	1647403	58.7	129077
Campylobacter	SRR10045171	51	1765450	44.8	130211
Campylobacter	SRR10045174	44	1608659	54.8	122775
Campylobacter	SRR10046453	21	1633466	67.7	183884
Campylobacter	SRR10046456	32	1728934	63.7	181048
Campylobacter	SRR10049632	64	1711737	78.5	103069
Campylobacter	SRR10049687	59	1634527	147.5	89604
Campylobacter	SRR10049697	59	1719169	110	141618
Campylobacter	SRR10049700	59	1716392	118.5	75424
Campylobacter	SRR10049740	176	1764621	47.1	62089
Campylobacter	SRR10049772	159	1802795	117.7	78997
Campylobacter	SRR10049782	60	1656544	98.2	70037
Campylobacter	SRR10049787	36	1718735	124.6	147626
Campylobacter	SRR10049789	36	1607091	121	129145
Campylobacter	SRR10049791	39	1626384	118.6	97576
Campylobacter	SRR10049801	73	1666032	199.3	59497
Campylobacter	SRR10049802	40	1671786	114.2	152281
Campylobacter	SRR10049826	70	1711003	122	99173
Campylobacter	SRR10049828	76	1729669	117.7	138645
Campylobacter	SRR10049831	137	1754768	121	112751
Campylobacter	SRR10049835	103	1683569	124.5	125907
Campylobacter	SRR10049840	60	1664575	154.4	77135
Campylobacter	SRR10049844	147	1780664	150.5	84221
Campylobacter	SRR10049861	63	1680348	165.8	129094
Campylobacter	SRR10049867	140	1774485	78.9	103953
Campylobacter	SRR10049871	36	1678546	149.5	105934
Campylobacter	SRR10049872	140	1821146	133.6	65466
Campylobacter	SRR10049886	87	1710147	74.2	94144
Campylobacter	SRR10049888	64	1640795	98.5	61623
Campylobacter	SRR10049897	52	1685866	187.2	105766
Campylobacter	SRR10049899	62	1690603	140	79537
Campylobacter	SRR10049903	64	1697348	107.8	128926
Campylobacter	SRR10049911	68	1656646	133.5	78454
Campylobacter	SRR10049912	117	1844427	119.9	135888
Campylobacter	SRR10049917	236	1815859	156	66260
Campylobacter	SRR10049919	104	1728481	165	41612
Campylobacter	SRR10049944	60	1674335	160.3	68089
Campylobacter	SRR10049950	78	1725484	161.9	76552
Campylobacter	SRR10049951	77	1734237	170.7	105107
Campylobacter	SRR10049953	62	1690986	119.8	78516
Campylobacter	SRR10049956	86	1697675	154.2	71311
Campylobacter	SRR10049958	51	1736615	154.5	109109
Campylobacter	SRR10049959	64	1607987	197.9	55884
Campylobacter	SRR10049961	62	1619331	127	85951
Campylobacter	SRR10049964	47	1616003	117.2	146037
Campylobacter	SRR10049975	206	1811351	134.8	33266
Campylobacter	SRR10049989	94	1656398	159	47338
Campylobacter	SRR10050002	29	1635071	117.7	162467
Campylobacter	SRR10050004	108	1703728	118.9	72804
Campylobacter	SRR10050006	141	1767110	166.1	84648
Campylobacter	SRR10050009	92	1714245	181.3	60651
Campylobacter	SRR10050010	105	1793672	84.3	135888
Campylobacter	SRR10050015	65	1691449	111.7	111427
Campylobacter	SRR10050019	79	1721113	81.2	79589
Campylobacter	SRR10050022	60	1667821	160.8	104055
Campylobacter	SRR10050033	79	1640201	158.7	65031
Campylobacter	SRR10050034	51	1725965	126.1	79489
Campylobacter	SRR10050038	78	1703491	146.6	96989
Campylobacter	SRR10050039	32	1587655	145.7	134037
Campylobacter	SRR10050040	157	1754400	151.8	42822
Campylobacter	SRR10050087	88	1696549	139.2	67363
Campylobacter	SRR10053437	111	1745292	99.5	42943
Campylobacter	SRR10053441	169	1768042	111.2	49867
Campylobacter	SRR10053442	66	1683192	100.6	62676
Campylobacter	SRR10053458	73	1688174	100.6	119185
Campylobacter	SRR10053459	81	1642501	115.5	57340
Campylobacter	SRR10053460	112	1726564	123	49058
Campylobacter	SRR10053465	71	1665828	113.2	90167
Campylobacter	SRR10053472	88	1641216	233.9	38515
Campylobacter	SRR10053476	74	1697431	112.6	92386
Campylobacter	SRR10053478	129	1772828	127	53127
Campylobacter	SRR10053480	66	1711250	101.8	91351
Campylobacter	SRR10053488	30	1590624	97.9	127341
Campylobacter	SRR10053498	44	1637142	102.4	137079
Campylobacter	SRR10053502	98	1683729	114.4	64684
Campylobacter	SRR10053518	92	1725735	135.3	48141
Campylobacter	SRR10053522	171	1764893	119.7	43422
Campylobacter	SRR10053530	111	1732453	134	35361
Campylobacter	SRR10053532	116	1733823	122.1	52383
Campylobacter	SRR10053536	129	1783157	114.6	55736
Campylobacter	SRR10053539	61	1655320	168.3	84501
Campylobacter	SRR10053547	152	1748297	130.7	36617
Campylobacter	SRR10053548	119	1667334	130.2	72693
Campylobacter	SRR10053554	78	1697948	121	96756
Campylobacter	SRR10053556	120	1706542	130	65026
Campylobacter	SRR10053569	112	1662027	122.7	48118
Campylobacter	SRR10053572	45	1768379	95	102294
Campylobacter	SRR10053576	85	1717698	106.1	108047
Campylobacter	SRR10053578	108	1710327	105.8	56226
Campylobacter	SRR10053580	114	1838617	96.2	82413
Campylobacter	SRR10053583	51	1689416	118.8	145374
Campylobacter	SRR10053586	152	1683838	163.4	30277
Campylobacter	SRR10053587	63	1619012	163.3	67734
Campylobacter	SRR10053588	67	1634725	167.3	67785
Campylobacter	SRR10053599	858	2028660	130.1	9685
Campylobacter	SRR10053609	58	1597789	129.4	62238
Campylobacter	SRR10053611	105	1800081	87.6	93659
Campylobacter	SRR10053612	46	1626123	165.1	84620
Campylobacter	SRR10053618	84	1686431	166.8	61901
Campylobacter	SRR10053624	292	1613183	176.4	12485
Campylobacter	SRR10053626	56	1598089	155.3	72534
Campylobacter	SRR10053630	173	1761714	104.7	47240
Campylobacter	SRR10053631	85	1641526	119.4	44047
Campylobacter	SRR10053634	118	1684933	157.3	31955
Campylobacter	SRR10053637	37	1660840	97.2	196461
Campylobacter	SRR10053650	89	1618017	133.1	39565
Campylobacter	SRR10053651	106	1696645	178	55855
Campylobacter	SRR10053652	55	1703182	126.1	90146
Campylobacter	SRR10053655	103	1772583	133.7	47909
Campylobacter	SRR10053657	54	1644719	101.1	63689
Campylobacter	SRR10053663	130	1797717	118.8	77619
Campylobacter	SRR10053667	93	1729961	146.7	71156
Campylobacter	SRR10053668	172	1795568	89	46861
Campylobacter	SRR10053673	81	1650118	120.2	61851
Campylobacter	SRR10053674	51	1645147	121.8	67640
Campylobacter	SRR10053675	64	1725451	216.7	68079
Campylobacter	SRR10053682	151	1706086	143.1	30356
Campylobacter	SRR10053686	52	1630608	204.6	89614
Campylobacter	SRR10053692	69	1663801	155.6	61503
Campylobacter	SRR10053703	32	1588386	113.1	134036
Campylobacter	SRR10053706	45	1645821	115.4	114583
Campylobacter	SRR10053713	60	1744022	75.2	99625
Campylobacter	SRR10053716	96	1640134	157.2	33308
Campylobacter	SRR10054079	87	1738346	148.9	62556
Campylobacter	SRR10054083	58	1731360	138.5	79934
Campylobacter	SRR10054088	120	1842019	101.7	99924
Campylobacter	SRR10054099	124	1752589	175	67688
Campylobacter	SRR10054104	309	1809775	158.6	50587
Campylobacter	SRR10054113	61	1688534	101.8	91603
Campylobacter	SRR10054114	94	1696379	172.8	61808
Campylobacter	SRR10054116	125	1682052	169.9	84632
Campylobacter	SRR10054118	72	1656956	127	67557
Campylobacter	SRR10054119	87	1726359	151.9	55506
Campylobacter	SRR10054120	65	1652452	120.5	88775
Campylobacter	SRR10054121	65	1733882	159.8	71286
Campylobacter	SRR10054123	60	1648756	199.4	78844
Campylobacter	SRR10054127	100	1694984	178.8	82414
Campylobacter	SRR10054129	84	1602165	94.9	48275
Campylobacter	SRR10054157	49	1699788	122.8	88517
Campylobacter	SRR10054158	66	1638835	168.5	64824
Campylobacter	SRR10054160	62	1638276	196.8	76014
Campylobacter	SRR10054164	87	1697208	120.2	67544
Campylobacter	SRR10054171	57	1674512	356.1	85034
Campylobacter	SRR10054172	42	1686140	103.1	122484
Campylobacter	SRR10054180	85	1752732	121.3	110867
Campylobacter	SRR10054184	74	1749976	168.8	129171
Campylobacter	SRR10054186	60	1684762	134.6	102909
Campylobacter	SRR10054194	60	1604524	140.3	74361
Campylobacter	SRR10054196	177	1767670	193.9	48521
Campylobacter	SRR10054258	50	1651161	114.4	78500
Campylobacter	SRR10054316	97	1655885	130.8	32331
Campylobacter	SRR10054353	103	1751573	121.8	48737
Campylobacter	SRR10054354	54	1617735	158.5	68178
Campylobacter	SRR10054362	41	1713508	93.6	169449
Campylobacter	SRR10054365	79	1662775	143.9	42038
Campylobacter	SRR10054367	93	1708589	129.1	71088
Campylobacter	SRR10054369	94	1698543	79.5	56041
Campylobacter	SRR10054370	87	1725934	113.8	67236
Campylobacter	SRR10054375	75	1698822	175.2	102427
Campylobacter	SRR10054388	53	1633023	185.5	83173
Campylobacter	SRR10054393	51	1697347	121.5	104090
Campylobacter	SRR10054394	94	1724046	128.7	72132
Campylobacter	SRR10054411	70	1606501	126.7	62126
Campylobacter	SRR10054413	49	1675558	371.3	118558
Campylobacter	SRR10054419	41	1661213	165.7	128151
Campylobacter	SRR10054422	79	1628779	114.7	49860
Campylobacter	SRR10054423	47	1647302	162.4	103496
Campylobacter	SRR10054434	46	1644769	195.2	92436
Campylobacter	SRR10054436	92	1756987	189.8	74075
Campylobacter	SRR10054438	95	1699458	133.5	43286
Campylobacter	SRR10054443	81	1737222	119.8	71706
Campylobacter	SRR10054452	133	1708100	137.5	34948
Campylobacter	SRR10054453	68	1677163	110.9	63193
Campylobacter	SRR10054458	40	1645665	115.3	82606
Campylobacter	SRR10054467	195	1806605	171	32801
Campylobacter	SRR10054471	75	1730716	118.7	105067
Campylobacter	SRR10054489	69	1642887	163.3	49863
Campylobacter	SRR10054494	153	1811629	99.8	64655
Campylobacter	SRR10054496	220	1654473	86.9	16169
Campylobacter	SRR10054520	55	1634784	149.1	78766
Campylobacter	SRR10054525	47	1600604	141.4	85727
Campylobacter	SRR10054607	80	1642842	144.9	56178
Campylobacter	SRR10054622	75	1722026	169.8	110136
Campylobacter	SRR10054631	91	1622054	109.2	48414
Campylobacter	SRR10054638	93	1690696	132.4	52247
Campylobacter	SRR10054672	57	1742054	76.8	107646
Campylobacter	SRR10054678	55	1673211	186.8	70536
Campylobacter	SRR10054679	167	1794155	146.8	49959
Campylobacter	SRR10054681	132	1768246	309.7	118612
Campylobacter	SRR10056649	69	1648152	133.5	61957
Campylobacter	SRR10056654	106	1638791	169.9	36447
Campylobacter	SRR10056658	49	1645556	163	116925
Campylobacter	SRR10056659	143	1745329	122.8	29063
Campylobacter	SRR10056664	60	1711471	174.1	128322
Campylobacter	SRR10056666	79	1770006	165.2	62598
Campylobacter	SRR10056667	65	1724627	229	98691
Campylobacter	SRR10056668	202	1623170	175.8	15081
Campylobacter	SRR10056674	110	1720484	242.1	60043
Campylobacter	SRR10056675	45	1694433	132.2	144250
Campylobacter	SRR10056681	95	1708000	93.7	160189
Campylobacter	SRR10056683	68	1637610	112.2	67774
Campylobacter	SRR10056684	56	1634123	154	83174
Campylobacter	SRR10056688	70	1632831	201.3	63657
Campylobacter	SRR10056689	100	1660538	122.1	40812
Campylobacter	SRR10056693	84	1674749	117.1	48924
Campylobacter	SRR10056695	77	1785169	194.8	89864
Campylobacter	SRR10056698	47	1670950	210.4	99089
Campylobacter	SRR10056703	63	1687320	158.3	71149
Campylobacter	SRR10056707	109	1599623	126.8	32010
Campylobacter	SRR10056710	181	1827547	133.7	29631
Campylobacter	SRR10056712	52	1637356	236.2	79151
Campylobacter	SRR10056713	40	1646391	188.3	88828
Campylobacter	SRR10056721	157	1641456	157.7	19545
Campylobacter	SRR10056724	93	1747236	164.2	59680
Campylobacter	SRR10056725	49	1648359	243.5	90167
Campylobacter	SRR10056732	58	1640608	203.5	88914
Campylobacter	SRR10056737	76	1661219	177.7	53964
Campylobacter	SRR10056743	45	1631703	132.7	93950
Campylobacter	SRR10056744	79	1651305	175.7	63837
Campylobacter	SRR10056745	51	1636232	158.7	68958
Campylobacter	SRR10056747	71	1749776	135.8	98649
Campylobacter	SRR10056754	100	1690828	158	87784
Campylobacter	SRR10056762	102	1823018	138.8	79293
Campylobacter	SRR10056774	63	1673347	156.1	78941
Campylobacter	SRR10056777	63	1756266	168.8	109950
Campylobacter	SRR10056784	100	1705957	187.9	51851
Campylobacter	SRR10056793	72	1729981	243.4	54151
Campylobacter	SRR10056796	46	1603219	148.5	130749
Campylobacter	SRR10056799	120	1721709	153.9	43785
Campylobacter	SRR10056801	63	1648035	168.7	82511
Campylobacter	SRR10056812	46	1641294	172.1	107444
Campylobacter	SRR10056823	97	1624454	162.2	33868
Campylobacter	SRR10056824	106	1685891	233.3	48776
Campylobacter	SRR10056831	69	1688353	174.9	92404
Campylobacter	SRR10056833	92	1670727	129	49553
Campylobacter	SRR10056834	90	1642829	182	38953
Campylobacter	SRR10056839	90	1649726	209	40790
Campylobacter	SRR10056847	61	1727418	167.7	115617
Campylobacter	SRR10056850	72	1722971	171.5	62263
Campylobacter	SRR10056852	44	1647244	170	128598
Campylobacter	SRR10056853	91	1697418	148.5	62901
Campylobacter	SRR10056862	72	1707586	196.3	140330
Campylobacter	SRR10056867	97	1631995	207.3	39604
Campylobacter	SRR10056868	77	1683256	178.9	58021
Campylobacter	SRR10056870	58	1614484	168.1	79809
Campylobacter	SRR10056879	65	1659234	149.4	78921
Campylobacter	SRR10056887	74	1770099	166.6	80249
Campylobacter	SRR10056888	66	1626148	133.8	59111
Campylobacter	SRR10056890	65	1627946	202.4	51934
Campylobacter	SRR10056894	74	1724516	216.9	77251
Campylobacter	SRR10056897	107	1630808	149.7	30310
Campylobacter	SRR10056902	94	1719842	230.3	110717
Campylobacter	SRR10056908	102	1698805	196.8	35884
Campylobacter	SRR10056909	64	1608668	131.7	54756
Campylobacter	SRR10060547	60	1676890	111.5	117470
Campylobacter	SRR10060552	148	1843998	130.8	66547
Campylobacter	SRR10060554	82	1817341	91.4	57926
Campylobacter	SRR10060556	54	1740577	114.4	103013
Campylobacter	SRR10060557	86	1645351	85.5	80216
Campylobacter	SRR10060629	124	1751232	90.1	75498
Campylobacter	SRR10060849	47	1676560	104.9	74282
Campylobacter	SRR10061450	67	1758300	143.5	212728
Campylobacter	SRR10061453	41	1665464	133	138130
Campylobacter	SRR10062454	107	1765803	86.5	71134
Campylobacter	SRR10062885	106	1766800	222.3	91160
Campylobacter	SRR10063337	34	1642959	82.8	261814
Campylobacter	SRR10063340	34	1659406	92.2	166325
Campylobacter	SRR10067662	70	1634708	98.4	51092
Campylobacter	SRR10067926	54	1645585	270.7	115458
Campylobacter	SRR10067934	74	1624778	257.8	44177
Campylobacter	SRR10067967	159	1593323	153.5	19710
Campylobacter	SRR10067968	60	1674619	209.1	71215
Campylobacter	SRR10067976	61	1680950	310.7	101587
Campylobacter	SRR10067985	75	1739074	182.5	61095
Campylobacter	SRR10068009	56	1662444	266	85301
Campylobacter	SRR10068074	133	1684800	63.4	23854
Campylobacter	SRR10068077	75	1726558	211.9	92879
Campylobacter	SRR10068080	83	1693421	156	43026
Campylobacter	SRR10068085	85	1641107	232.4	38114
Campylobacter	SRR10068095	90	1707742	237.7	49880
Campylobacter	SRR10068100	49	1637418	166.2	68068
Campylobacter	SRR10068103	124	1763610	138.5	70183
Campylobacter	SRR10068117	105	1772273	138.7	82254
Campylobacter	SRR10068120	95	1693385	179.1	45098
Campylobacter	SRR10068125	135	1715258	139.5	24815
Campylobacter	SRR10068131	63	1655293	218.8	79621
Campylobacter	SRR10068196	47	1627536	324.8	129322
Campylobacter	SRR10069378	91	1696839	78.2	38593
Campylobacter	SRR10069380	100	1615269	39.7	33014
Campylobacter	SRR10069382	130	1762202	67.2	42646
Campylobacter	SRR10069383	80	1767271	90	82460
Campylobacter	SRR10069386	125	1742483	86.4	67546
Campylobacter	SRR10069391	90	1681282	135.8	76277
Campylobacter	SRR10069398	39	1639543	148.2	92301
Campylobacter	SRR10069401	73	1698917	76.4	57523
Campylobacter	SRR10069408	215	1692539	62.7	16279
Campylobacter	SRR10069412	258	1834603	72.8	20387
Campylobacter	SRR10069413	172	1687753	69.2	20518
Campylobacter	SRR10069414	258	1837287	77	19795
Campylobacter	SRR10069418	195	1617065	58.9	18839
Campylobacter	SRR10069423	171	1722240	74.2	19585
Campylobacter	SRR10069429	218	1700204	65.7	24719
Campylobacter	SRR10069430	160	1706956	89.4	29415
Campylobacter	SRR10071322	89	1649923	101	42231
Campylobacter	SRR10071323	139	1677576	88.3	29823
Campylobacter	SRR10071332	246	1846178	102.6	23480
Campylobacter	SRR10071335	214	1878087	107.6	31873
Campylobacter	SRR10071337	194	1865169	96.9	40484
Campylobacter	SRR10071629	113	1625174	104.1	34594
Campylobacter	SRR10071630	81	1605908	113.9	53076
Campylobacter	SRR10071634	179	1762552	79.1	26328
Campylobacter	SRR10071636	150	1664855	90.4	23119
Campylobacter	SRR10071664	160	1757365	104.7	30792
Campylobacter	SRR10071666	122	1669055	104.3	31719
Campylobacter	SRR10072854	41	1674914	37.9	157221
Campylobacter	SRR10072855	37	1630132	40.2	142205
Campylobacter	SRR10075316	55	1639834	50.2	102404
Campylobacter	SRR10075326	108	1678827	63.5	31035
Campylobacter	SRR10075993	73	1748931	156.9	88255
Campylobacter	SRR10075994	38	1673258	130.8	117915
Campylobacter	SRR10075996	48	1684124	113.7	90043
Campylobacter	SRR10081012	66	1858723	73.5	108526
Campylobacter	SRR10081716	36	1672525	117.9	152239
Campylobacter	SRR10081717	118	1843706	128.6	100232
Campylobacter	SRR10081723	62	1597277	148.2	87292
Campylobacter	SRR10081724	72	1800582	151.9	101597
Campylobacter	SRR10082193	53	1812546	60.1	141360
Campylobacter	SRR10082199	33	1715279	53.7	114954
Campylobacter	SRR10082202	105	1894600	73.6	96348
Campylobacter	SRR10082206	41	1662258	81.5	177543
Campylobacter	SRR10082212	36	1634471	72.7	128643
Campylobacter	SRR10082214	60	1762959	67.1	117149
Campylobacter	SRR10082216	80	1810867	51.1	99568
Campylobacter	SRR10082225	35	1729341	91.4	162205
Campylobacter	SRR10082297	104	1683042	179.4	61136
Campylobacter	SRR10082302	80	1628340	155.5	40095
Campylobacter	SRR10082376	116	1720878	122.4	35265
Campylobacter	SRR10083001	120	1712376	247.6	42313
Campylobacter	SRR10083540	40	1606839	191.3	114519
Campylobacter	SRR10084745	121	1709962	58.3	43793
Campylobacter	SRR10084747	90	1622556	76	39390
Campylobacter	SRR10084922	48	1668494	124.6	99245
Campylobacter	SRR10087900	30	1603584	359.7	184726
Campylobacter	SRR10088234	84	1753644	122.6	135381
Campylobacter	SRR10089965	38	1606598	152.2	125296
Campylobacter	SRR10096956	85	1673303	99.4	83231
Campylobacter	SRR10096957	99	1723721	112.4	82324
Campylobacter	SRR10096958	273	1957039	71.2	22713
Campylobacter	SRR10096967	207	1772797	66	32126
Campylobacter	SRR10096969	87	1717871	76.8	62665
Campylobacter	SRR10096973	90	1745161	133.1	128102
Campylobacter	SRR10096977	56	1672126	111.3	81862
Campylobacter	SRR10096980	69	1740613	86.8	70741
Campylobacter	SRR10096982	51	1758392	106.9	88637
Campylobacter	SRR10096983	69	1750742	101.2	72084
Campylobacter	SRR10096987	65	1663881	83.1	89119
Campylobacter	SRR10096988	87	1690785	103.9	107686
Campylobacter	SRR10096991	55	1660324	97.6	97543
Campylobacter	SRR10096994	85	1807733	81.5	75356
Campylobacter	SRR10096999	30	1738660	68.6	144352
Campylobacter	SRR10097000	18	1652703	83.7	175383
Campylobacter	SRR10097003	86	1792530	58.6	140303
Campylobacter	SRR10097006	64	1703287	57.6	116782
Campylobacter	SRR10097009	37	1607520	68.2	146964
Campylobacter	SRR10097011	28	1662517	30.7	146861
Campylobacter	SRR10097012	48	1659236	63.4	128683
Campylobacter	SRR10097019	29	1705112	58	171861
Campylobacter	SRR10097020	35	1677804	63.1	114155
Campylobacter	SRR10097021	37	1705674	75.8	130749
Campylobacter	SRR10097023	31	1650916	56.5	151538
Campylobacter	SRR10097026	32	1744600	68.8	162591
Campylobacter	SRR10100121	67	1673373	154.4	53150
Campylobacter	SRR10100123	269	1633761	57.9	13304
Campylobacter	SRR10100125	37	1628739	118.9	184836
Campylobacter	SRR10100128	320	1729723	77.4	21226
Campylobacter	SRR10100136	75	1602338	117.7	47572
Campylobacter	SRR10103059	135	1728213	73.5	30537
Campylobacter	SRR10103061	284	1595059	43.3	11136
Campylobacter	SRR10106484	34	1626063	101.4	189943
Campylobacter	SRR10113190	272	1838245	86.8	20373
Campylobacter	SRR10113197	118	1736483	83.3	38305
Campylobacter	SRR10113212	99	1675581	89.6	36774
Campylobacter	SRR10113602	123	1639748	92.2	32420
Campylobacter	SRR10113605	188	1751785	89.4	27770
Campylobacter	SRR10113606	241	1821966	84.1	23543
Campylobacter	SRR10113607	130	1713957	81	33978
Campylobacter	SRR10113614	201	1882198	92.1	30347
Campylobacter	SRR10113617	126	1664395	93.1	29574
Campylobacter	SRR10116194	31	1643848	80.4	121379
Campylobacter	SRR10119150	67	1633767	84.2	81372
Campylobacter	SRR10119151	88	1769852	87.6	89533
Campylobacter	SRR10119152	101	1741299	78.5	48964
Campylobacter	SRR10119176	43	1586085	86.4	87079
Campylobacter	SRR10120330	46	1633909	111.6	84206
Campylobacter	SRR10120331	36	1602440	88.6	106838
Campylobacter	SRR10121283	247	1762729	123.9	86712
Campylobacter	SRR10123453	147	1736776	116.3	30656
Campylobacter	SRR10123457	189	1805071	102.7	36395
Campylobacter	SRR10123469	256	1795605	97.1	19297
Campylobacter	SRR10123510	272	1824280	97.8	18953
Campylobacter	SRR10123511	193	1754016	123	41147
Campylobacter	SRR10123516	124	1692583	109.2	28278
Campylobacter	SRR10124969	49	1610637	134.8	89247
Campylobacter	SRR10126468	98	1716058	112.2	53487
Campylobacter	SRR10126604	66	1678196	101.8	44484
Campylobacter	SRR10126629	121	1714902	58.3	29044
Campylobacter	SRR10126630	131	1838957	99.9	48842
Campylobacter	SRR10126639	53	1728167	87.8	58701
Campylobacter	SRR10126642	115	1824934	107.7	56550
Campylobacter	SRR10126658	136	1727202	68	54074
Campylobacter	SRR10131197	77	1746866	121.4	74833
Campylobacter	SRR10131488	112	1638036	99.4	46169
Campylobacter	SRR10131496	80	1664663	122.2	48370
Campylobacter	SRR10136061	34	1618316	163.8	160355
Campylobacter	SRR10138273	39	1691803	96.3	103090
Campylobacter	SRR10139438	59	1671880	132.6	87010
Campylobacter	SRR10139439	87	1695223	60.7	39727
Campylobacter	SRR10139500	71	1725842	212.6	111146
Campylobacter	SRR10139501	72	1764123	177.5	111143
Campylobacter	SRR10139521	206	1838700	68	32111
Campylobacter	SRR10139836	192	1613216	72.7	15957
Campylobacter	SRR10140562	44	1581761	332.4	108263
Campylobacter	SRR10148689	36	1617466	146.3	115466
Campylobacter	SRR10148690	28	1590151	139.7	183962
Campylobacter	SRR10148691	39	1600818	146.9	134550
Campylobacter	SRR10149707	34	1603301	121.6	151158
Campylobacter	SRR10149712	33	1622675	113.1	204432
Campylobacter	SRR10153082	81	1598019	104.8	49767
Campylobacter	SRR10153653	73	1676838	126.6	54129
Campylobacter	SRR10153690	181	1789043	86.6	28664
Campylobacter	SRR10153691	242	1732470	84	20951
Campylobacter	SRR10153694	55	1634769	139	76015
Campylobacter	SRR10153942	233	1883411	92.8	25795
Campylobacter	SRR10153943	68	1782529	175.9	91023
Campylobacter	SRR10154098	297	1704780	48.4	11911
Campylobacter	SRR10154184	121	1717739	108.2	42798
Campylobacter	SRR10154191	116	1668916	113.7	31472
Campylobacter	SRR10154192	108	1858979	100	81315
Campylobacter	SRR10154198	72	1664925	106.5	61413
Campylobacter	SRR10154209	77	1650051	89	69329
Campylobacter	SRR10154436	83	1708933	143.7	139480
Campylobacter	SRR10155256	39	1644279	283	133687
Campylobacter	SRR10156760	37	1637672	259.1	119429
Campylobacter	SRR10162566	254	1718950	69.3	15046
Campylobacter	SRR10162585	182	1756930	124.9	42147
Campylobacter	SRR10164019	64	1711645	59.8	112136
Campylobacter	SRR10164020	56	1787574	131.4	147181
Campylobacter	SRR10164021	47	1634435	31.1	98041
Campylobacter	SRR10164024	91	1693932	96.2	43458
Campylobacter	SRR10164083	50	1607837	71.8	89592
Campylobacter	SRR10164093	42	1694914	90.4	121310
Campylobacter	SRR10164106	44	1650604	102.9	107823
Campylobacter	SRR10164107	32	1612549	124.6	114324
Campylobacter	SRR10164117	110	1750474	75.1	65055
Campylobacter	SRR10164120	86	1768093	61	55332
Campylobacter	SRR10164125	120	1877112	87.7	75251
Campylobacter	SRR10164126	47	1608601	117.4	140875
Campylobacter	SRR10164135	40	1694656	95.5	78816
Campylobacter	SRR10166186	174	1841461	120	41529
Campylobacter	SRR10166202	39	1638320	129	110537
Campylobacter	SRR10166242	93	1687911	115.9	54660
Campylobacter	SRR10166447	84	1826931	83.2	59657
Campylobacter	SRR10166460	59	1703206	81.6	70837
Campylobacter	SRR10166464	269	1752588	100.4	63420
Campylobacter	SRR10166465	108	1742661	82.8	40402
Campylobacter	SRR10166468	74	1604312	98.5	55663
Campylobacter	SRR10172964	110	1676526	74.3	42092
Campylobacter	SRR10172991	106	1718405	107.5	49060
Campylobacter	SRR10173106	69	1843635	150.8	174613
Campylobacter	SRR10173560	149	1581170	81.2	19236
Campylobacter	SRR10173568	155	1579914	97.8	22056
Campylobacter	SRR10173599	101	1613170	111	31681
Campylobacter	SRR10173601	181	1586668	61.5	15492
Campylobacter	SRR10173609	85	1618305	91.5	42998
Campylobacter	SRR10173666	191	1571978	69.4	14186
Campylobacter	SRR10173671	198	1664126	73	17834
Campylobacter	SRR10173702	92	1626055	93.5	45385
Campylobacter	SRR10173711	164	1612663	61.3	22151
Campylobacter	SRR10173714	112	1666042	72.9	29876
Campylobacter	SRR10174194	126	1639917	73.9	34398
Campylobacter	SRR10174195	171	1569362	68.2	18502
Campylobacter	SRR10174203	228	1597025	68.2	14245
Campylobacter	SRR10174303	29	1596733	119.9	181188
Campylobacter	SRR10174307	35	1675632	68.3	185926
Campylobacter	SRR10174310	35	1595460	154.2	151297
Campylobacter	SRR10178399	36	1633459	123.6	116231
Campylobacter	SRR10178406	46	1669038	100.4	105221
Campylobacter	SRR10178408	67	1719128	101.1	167675
Campylobacter	SRR10178788	32	1637524	161.2	197629
Campylobacter	SRR10179316	100	1795437	128.1	155304
Campylobacter	SRR10185772	65	1770520	160.9	111039
Campylobacter	SRR10186372	152	1602051	77.3	23088
Campylobacter	SRR10186855	91	1672547	105.1	78939
Campylobacter	SRR10186858	108	1729265	125.7	44215
Campylobacter	SRR10186863	88	1815608	63.1	57575
Campylobacter	SRR10186869	56	1656360	79.3	95589
Campylobacter	SRR10186870	239	1878108	62.4	28831
Campylobacter	SRR10186926	239	1808333	79.2	27383
Campylobacter	SRR10186959	160	1861416	54.7	42085
Campylobacter	SRR10186960	124	1698519	60.8	34821
Campylobacter	SRR10186970	72	1636198	70.8	46501
Campylobacter	SRR10186972	57	1610591	93.2	67961
Campylobacter	SRR10186977	130	1762019	81.3	82808
Campylobacter	SRR10190413	66	1727539	40.8	148463
Campylobacter	SRR10190436	31	1602924	101.8	151167
Campylobacter	SRR10190490	38	1618772	47.1	189906
Campylobacter	SRR10190621	41	1744950	54.8	140575
Campylobacter	SRR10190822	33	1638245	52.6	160421
Campylobacter	SRR10190830	35	1654695	31.5	147816
Campylobacter	SRR10190958	47	1693812	40.8	154438
Campylobacter	SRR10190963	39	1723343	58.6	129655
Campylobacter	SRR10192554	127	1816965	58	31928
Campylobacter	SRR10192556	96	1820468	71	36790
Campylobacter	SRR10192578	125	1755871	51.2	38780
Campylobacter	SRR10192583	71	1618490	71.5	49993
Campylobacter	SRR10192609	181	1841276	84.2	46461
Campylobacter	SRR10194542	68	1725616	125.2	153805
Campylobacter	SRR10194544	38	1723993	108	155338
Campylobacter	SRR10194550	41	1748525	149	161741
Campylobacter	SRR10196341	113	1869688	78.2	68347
Campylobacter	SRR10197209	247	1859496	135.9	23899
Campylobacter	SRR10197472	103	1669284	97.1	48736
Campylobacter	SRR10197473	90	1671061	132.3	51276
Campylobacter	SRR10197475	198	1813928	118.6	23880
Campylobacter	SRR10197477	105	1659909	115.7	33570
Campylobacter	SRR10197478	85	1690643	111.3	46802
Campylobacter	SRR10197487	92	1678816	124.5	47216
Campylobacter	SRR10197488	127	1776940	119.1	39222
Campylobacter	SRR10197489	191	1797385	111.4	34884
Campylobacter	SRR10197493	70	1657848	118.8	46561
Campylobacter	SRR10197497	64	1700822	113.4	55742
Campylobacter	SRR10197498	121	1750477	102	55954
Campylobacter	SRR10198953	125	1821440	105.7	82565
Campylobacter	SRR10198956	36	1619653	73	85434
Campylobacter	SRR10198957	45	1642640	112	130389
Campylobacter	SRR10198958	67	1755891	103.5	91241
Campylobacter	SRR10198967	47	1727268	134	97630
Campylobacter	SRR10198968	32	1728141	127.2	116878
Campylobacter	SRR10198969	85	1669325	111.2	98127
Campylobacter	SRR10198972	55	1709344	129.1	98419
Campylobacter	SRR10198980	152	1878986	100.8	81406
Campylobacter	SRR10200126	86	1648995	99.5	42945
Campylobacter	SRR10200131	74	1650415	99.5	48870
Campylobacter	SRR10200132	191	1731066	88.5	24069
Campylobacter	SRR10200136	157	1664547	93.2	26388
Campylobacter	SRR10200140	224	1846763	93.2	26978
Campylobacter	SRR10200147	203	1834816	98.5	28610
Campylobacter	SRR10200148	142	1738767	78.9	29003
Campylobacter	SRR10203777	39	1637557	163.4	116499
Campylobacter	SRR10203797	243	1739713	97.1	18593
Campylobacter	SRR10203798	79	1603105	161.5	59655
Campylobacter	SRR10204410	121	1626497	82.7	31480
Campylobacter	SRR10204485	62	1696951	86.3	67769
Campylobacter	SRR10207397	43	1734610	52	131463
Campylobacter	SRR10207400	31	1638234	89.7	119429
Campylobacter	SRR10210059	49	1655764	155.3	70736
Campylobacter	SRR10210124	73	1718398	82	102977
Campylobacter	SRR10210167	55	1682300	95.9	90367
Campylobacter	SRR10210168	113	1777369	91.9	81496
Campylobacter	SRR10210171	56	1695798	117.4	104056
Campylobacter	SRR10210190	69	1707753	95.5	55553
Campylobacter	SRR10210205	90	1723759	95.2	61859
Campylobacter	SRR10210208	64	1729044	63.2	76070
Campylobacter	SRR10213003	25	1694975	66.2	178090
Campylobacter	SRR10213005	42	1651812	76.6	144306
Campylobacter	SRR10213010	31	1603232	100.2	151157
Campylobacter	SRR10218506	53	1649856	78.8	50540
Campylobacter	SRR10218510	67	1641342	57.4	60111
Campylobacter	SRR10218512	73	1682514	67.7	51145
Campylobacter	SRR10218554	157	1752542	43.5	29882
Campylobacter	SRR10218563	105	1662325	59.9	45967
Campylobacter	SRR10218584	46	1688396	80.9	90583
Campylobacter	SRR10218587	61	1785906	80.8	80365
Campylobacter	SRR10218589	70	1623306	82.7	61797
Campylobacter	SRR10218590	69	1683106	78.6	50877
Campylobacter	SRR10218626	354	1916485	68.5	36093
Campylobacter	SRR10218631	79	1813907	72.3	65046
Campylobacter	SRR10218635	119	1693839	59.8	30150
Campylobacter	SRR10218643	54	1787300	102.1	89489
Campylobacter	SRR10218650	43	1674578	112.3	185875
Campylobacter	SRR10218653	110	1705551	65	42316
Campylobacter	SRR10218658	126	1659494	43.9	30774
Campylobacter	SRR10218671	57	1629367	80.8	74267
Campylobacter	SRR10218674	73	1727294	77.1	75037
Campylobacter	SRR10222065	375	1617803	66.3	10495
Campylobacter	SRR10222423	159	1810026	128.1	64975
Campylobacter	SRR10222535	65	1737005	60.8	102455
Campylobacter	SRR10222536	63	1842336	84.1	101625
Campylobacter	SRR10222537	87	1686721	59.3	78187
Campylobacter	SRR10222538	22	1645498	101.9	139728
Campylobacter	SRR10222540	66	1843625	72.7	75710
Campylobacter	SRR10222541	52	1688359	65.3	99887
Campylobacter	SRR10222542	59	1724932	64.8	79581
Campylobacter	SRR10222550	266	1661508	28.2	13510
Campylobacter	SRR10222551	41	1615110	121.5	127649
Campylobacter	SRR10222552	39	1648175	92.7	140933
Campylobacter	SRR10222581	113	1650494	102.4	40608
Campylobacter	SRR10222592	38	1647326	126.5	125752
Campylobacter	SRR10224711	159	1644892	43.4	22851
Campylobacter	SRR10224718	140	1698600	55.9	29311
Campylobacter	SRR10224722	74	1616578	71.9	42192
Campylobacter	SRR10224731	89	1702473	60.8	43685
Campylobacter	SRR10224733	54	1660556	67.9	51833
Campylobacter	SRR10224734	62	1724744	51.2	94146
Campylobacter	SRR10224739	117	1781551	69	46852
Campylobacter	SRR10224741	94	1699018	78.6	36871
Campylobacter	SRR10224749	169	1871149	68.2	28362
Campylobacter	SRR10224753	186	1700327	55.3	20093
Campylobacter	SRR10224754	142	1644952	48.6	21357
Campylobacter	SRR10224757	48	1657914	82.8	77435
Campylobacter	SRR10224767	204	1599788	59	15990
Campylobacter	SRR10224785	139	1743166	58.6	32351
Campylobacter	SRR10224787	90	1582790	61.8	33144
Campylobacter	SRR10224788	90	1674278	60.5	51873
Campylobacter	SRR10224790	137	1718124	43.4	25233
Campylobacter	SRR10224924	105	1721821	58	53375
Campylobacter	SRR10225355	108	1590928	127.8	28740
Campylobacter	SRR10228106	35	1766777	63.6	162765
Campylobacter	SRR10228526	45	1582602	134.1	178289
Campylobacter	SRR10228574	47	1648801	280.9	104055
Campylobacter	SRR10228577	66	1737621	191.3	136593
Campylobacter	SRR10228578	123	1858300	169.4	132572
Campylobacter	SRR10228586	69	1702026	221.3	128402
Campylobacter	SRR10229788	55	1758873	65.5	148495
Campylobacter	SRR10229792	34	1635578	91.3	184823
Campylobacter	SRR10229806	32	1676808	81.3	124189
Campylobacter	SRR10229807	37	1609195	66.3	134553
Campylobacter	SRR10229817	35	1669758	65.7	187250
Campylobacter	SRR10229820	48	1657560	72.2	111309
Campylobacter	SRR10229915	43	1609388	57.8	151716
Campylobacter	SRR10229918	24	1625625	76.7	173167
Campylobacter	SRR10229925	32	1606106	35.3	118883
Campylobacter	SRR10229927	38	1636134	39.6	154400
Campylobacter	SRR10229929	34	1637421	84.1	197627
Campylobacter	SRR10231318	108	1656904	60.7	37089
Campylobacter	SRR10231322	66	1598796	78.1	68367
Campylobacter	SRR10231326	57	1626564	76.8	70199
Campylobacter	SRR10233201	47	1695941	77.8	103754
Campylobacter	SRR10233205	48	1788804	101.1	174900
Campylobacter	SRR10233206	94	1769199	86.2	99076
Campylobacter	SRR10233210	56	1763837	101.8	110909
Campylobacter	SRR10233211	44	1635542	67.5	98781
Campylobacter	SRR10233216	21	1679636	78.4	171658
Campylobacter	SRR10233217	73	1768357	95.4	154545
Campylobacter	SRR10233218	150	1777037	94	102220
Campylobacter	SRR10233288	25	1635511	88.6	138136
Campylobacter	SRR10235693	49	1614847	211.9	106329
Campylobacter	SRR10235694	41	1674395	250.5	129133
Campylobacter	SRR10237526	79	1756340	122.4	83387
Campylobacter	SRR10237636	33	1705541	311.5	153387
Campylobacter	SRR10244253	168	1673356	29.1	29570
Campylobacter	SRR10244631	186	1725810	98.6	27341
Campylobacter	SRR10244632	220	1558211	57.9	15261
Campylobacter	SRR10244984	54	1653645	60.9	98870
Campylobacter	SRR10245474	166	1641102	67.5	18718
Campylobacter	SRR10245478	178	1723124	100.5	27294
Campylobacter	SRR10245552	216	1650951	62.7	16727
Campylobacter	SRR10245576	81	1670904	64.1	51547
Campylobacter	SRR10245582	49	1592213	117.6	97553
Campylobacter	SRR10245610	52	1628376	128.8	98298
Campylobacter	SRR10245622	52	1702490	90.8	81674
Campylobacter	SRR10245627	81	1759107	128.3	85705
Campylobacter	SRR10245629	81	1866085	88.5	79515
Campylobacter	SRR10245642	38	1742358	153.1	166386
Campylobacter	SRR10245659	180	1826640	88	90483
Campylobacter	SRR10245661	55	1723527	140.4	75155
Campylobacter	SRR10246254	55	1634768	80.4	83377
Campylobacter	SRR10246258	39	1609359	78.4	88992
Campylobacter	SRR10246380	81	1702818	63.5	73050
Campylobacter	SRR10246387	53	1632604	146.6	90307
Campylobacter	SRR10246388	48	1652745	87.5	85014
Campylobacter	SRR10246395	42	1693504	233	128579
Campylobacter	SRR10246776	74	1795080	88.4	124874
Campylobacter	SRR10246839	39	1638176	84.9	129739
Campylobacter	SRR10246850	43	1639049	82.1	116494
Campylobacter	SRR10247420	37	1636579	93.4	197603
Campylobacter	SRR10247421	45	1644014	94.6	164440
Campylobacter	SRR10247422	58	1733401	108	112362
Campylobacter	SRR10247425	41	1703440	103.3	106401
Campylobacter	SRR10247426	24	1620596	128.3	166853
Campylobacter	SRR10247434	30	1625641	99.5	154144
Campylobacter	SRR10247437	71	1691802	97.7	154467
Campylobacter	SRR10247438	44	1730271	47.5	117293
Campylobacter	SRR10250540	166	1707943	75.7	25310
Campylobacter	SRR10250542	175	1581388	48.5	17989
Campylobacter	SRR10250546	61	1669330	191.7	84156
Campylobacter	SRR10250554	108	1671721	93.5	27307
Campylobacter	SRR10250570	181	1672932	85.6	18849
Campylobacter	SRR10250593	126	1640533	84.6	29139
Campylobacter	SRR10250947	55	1709152	244.5	103648
Campylobacter	SRR10253489	89	1682057	215.3	47762
Campylobacter	SRR10253490	87	1682579	227.3	48778
Campylobacter	SRR10253491	93	1644301	272	42321
Campylobacter	SRR10254840	42	1653449	36.9	111644
Campylobacter	SRR10254842	70	1677421	29.5	111143
Campylobacter	SRR10254843	37	1609505	38	113352
Campylobacter	SRR10254853	71	1765365	34.9	142778
Campylobacter	SRR10257434	86	1818253	93.3	128621
Campylobacter	SRR10257661	219	1733613	84.4	19209
Campylobacter	SRR10257935	273	1819365	88.2	17577
Campylobacter	SRR10258043	158	1842893	94.8	64986
Campylobacter	SRR10258048	88	1691508	167.3	75489
Campylobacter	SRR10258049	64	1746042	119.3	69162
Campylobacter	SRR10258050	76	1715513	95.1	80298
Campylobacter	SRR10258051	35	1609574	129	82794
Campylobacter	SRR10258052	61	1632391	63.6	59758
Campylobacter	SRR10258133	38	1678281	91	92670
Campylobacter	SRR10258330	222	1864497	64.5	27569
Campylobacter	SRR10258331	62	1681778	87.6	79209
Campylobacter	SRR10258337	180	1928502	68.8	38015
Campylobacter	SRR10258340	65	1695939	206.7	81422
Campylobacter	SRR10258341	94	1749286	91.5	59735
Campylobacter	SRR10258345	164	1873320	71.3	49750
Campylobacter	SRR10258349	63	1635889	122.6	68015
Campylobacter	SRR10258350	152	1779971	81.9	48580
Campylobacter	SRR10258353	134	1786922	126.3	83601
Campylobacter	SRR10267084	116	1621647	143.7	97595
Campylobacter	SRR10267086	85	1719510	101.7	62302
Campylobacter	SRR10273634	140	1728913	81.3	28960
Campylobacter	SRR10274375	63	1604442	202.2	71182
Campylobacter	SRR10274378	57	1614573	154.6	69799
Campylobacter	SRR10274380	28	1599776	129.1	118880
Campylobacter	SRR10274381	38	1643885	118.2	144304
Campylobacter	SRR10276185	39	1729480	76.4	162765
Campylobacter	SRR10276186	33	1609695	128.7	151130
Campylobacter	SRR10277530	576	1842366	59.4	6699
Campylobacter	SRR10278244	48	1662831	44.9	110987
Campylobacter	SRR10281747	34	1592401	108.7	166949
Campylobacter	SRR10281750	54	1712868	73.8	135487
Campylobacter	SRR10281753	39	1650365	109.1	119825
Campylobacter	SRR10281755	29	1592111	93.2	144597
Campylobacter	SRR10281757	32	1622977	99.7	138323
Campylobacter	SRR10281758	42	1767142	106.2	153152
Campylobacter	SRR10281761	34	1635726	93.2	116397
Campylobacter	SRR10283160	44	1698639	144.1	162688
Campylobacter	SRR10286875	83	1746369	123.4	58379
Campylobacter	SRR10286884	121	1768226	73.5	46576
Campylobacter	SRR10286887	79	1777969	102.7	82342
Campylobacter	SRR10286919	50	1758402	90.2	113141
Campylobacter	SRR10286946	46	1675044	81	96114
Campylobacter	SRR10286948	92	1774236	132.5	100600
Campylobacter	SRR10286961	157	1754300	75.7	34194
Campylobacter	SRR10286964	123	1864796	107.2	78709
Campylobacter	SRR10286985	40	1632711	117.4	97604
Campylobacter	SRR10286986	103	1668440	62.2	48198
Campylobacter	SRR10287002	58	1656220	72.5	82228
Campylobacter	SRR10287005	56	1716474	76.1	97404
Campylobacter	SRR10287008	249	1652469	34.1	12151
Campylobacter	SRR10287036	192	1669295	44.2	18336
Campylobacter	SRR10287046	29	1635886	99	103597
Campylobacter	SRR10287047	63	1660429	68.7	60451
Campylobacter	SRR10287048	104	1672364	63.5	31719
Campylobacter	SRR10287049	164	1877919	45.3	62163
Campylobacter	SRR10287064	229	1770851	40.9	22757
Campylobacter	SRR10294175	110	1652504	157.6	35199
Campylobacter	SRR10298334	356	1671933	61.2	10104
Campylobacter	SRR10298336	259	1605750	65	15173
Campylobacter	SRR10298337	187	1658457	58	21464
Campylobacter	SRR10298341	221	1783336	51.1	23219
Campylobacter	SRR10301757	64	1781855	153.7	107303
Campylobacter	SRR10303233	47	1635965	25.4	114643
Campylobacter	SRR10303242	41	1634780	29.9	154531
Campylobacter	SRR10303248	35	1621748	32.9	154086
Campylobacter	SRR10303252	53	1692816	27.2	128413
Campylobacter	SRR10303389	74	1814442	84.9	84153
Campylobacter	SRR10303390	65	1625090	90.6	78378
Campylobacter	SRR10303397	87	1770711	107.6	44942
Campylobacter	SRR10303403	58	1732912	81.1	104137
Campylobacter	SRR10303404	76	1624429	148.8	61106
Campylobacter	SRR10303408	66	1756941	76.6	70930
Campylobacter	SRR10309987	159	1616868	100.4	20933
Campylobacter	SRR10309988	86	1759002	72.2	120045
Campylobacter	SRR10310361	39	1635296	90	154391
Campylobacter	SRR10311570	48	1670760	55.5	112633
Campylobacter	SRR10311842	60	1643344	84.9	60736
Campylobacter	SRR10311845	46	1654082	124.5	86969
Campylobacter	SRR10311849	63	1808967	78	76013
Campylobacter	SRR10311861	67	1695983	112.9	68664
Campylobacter	SRR10311862	166	1851753	61.7	52613
Campylobacter	SRR10311864	114	1797873	53.1	87271
Campylobacter	SRR10311866	69	1703079	128.8	67234
Campylobacter	SRR10312211	39	1634985	120.7	160433
Campylobacter	SRR10312218	19	1653431	76.3	184867
Campylobacter	SRR10312220	32	1601325	97.9	169427
Campylobacter	SRR10312222	43	1606562	103.7	145751
Campylobacter	SRR10312229	235	1752034	73	31339
Campylobacter	SRR10312456	84	1730763	75.3	67554
Campylobacter	SRR10312461	153	1854151	70.9	80524
Campylobacter	SRR10312462	41	1652215	81.8	80632
Campylobacter	SRR10312470	84	1710388	85.4	50762
Campylobacter	SRR10312482	45	1655812	85.8	90146
Campylobacter	SRR10313765	41	1658344	477.1	147822
Campylobacter	SRR10314893	140	1800766	179.9	80424
Campylobacter	SRR10316202	191	1870263	130.3	41555
Campylobacter	SRR10316206	159	1718153	88.1	24360
Campylobacter	SRR10316210	110	1672894	69.7	36415
Campylobacter	SRR10321257	127	1844464	72.4	66234
Campylobacter	SRR10321262	145	1743948	91.8	76776
Campylobacter	SRR10321265	143	1880582	80.3	71237
Campylobacter	SRR10321267	54	1651549	75.7	67326
Campylobacter	SRR10321278	99	1789125	87	49775
Campylobacter	SRR10324704	88	1701866	125	43422
Campylobacter	SRR10324705	63	1632266	130.3	58181
Campylobacter	SRR10324706	67	1686295	92.5	82703
Campylobacter	SRR10326097	31	1621402	443.4	153748
Campylobacter	SRR10338031	42	1603252	129	184847
Campylobacter	SRR10338032	49	1625384	105.4	111589
Campylobacter	SRR10338034	32	1587899	156.6	183962
Campylobacter	SRR10338049	82	1664832	172.9	124633
Campylobacter	SRR10338056	49	1627110	168	96658
Campylobacter	SRR10342770	121	1662659	120.1	30700
Campylobacter	SRR10342771	111	1747780	100.1	50245
Campylobacter	SRR10342773	82	1663312	85.8	54212
Campylobacter	SRR10342774	63	1658981	58.8	78281
Campylobacter	SRR10342779	203	1779600	73.6	24573
Campylobacter	SRR10342785	120	1729142	90.9	32895
Campylobacter	SRR10343008	42	1621640	122.9	114520
Campylobacter	SRR10346124	111	1684872	49.3	36580
Campylobacter	SRR10348593	40	1727292	84.4	121685
Campylobacter	SRR10348595	36	1671105	62	115002
Campylobacter	SRR10348603	52	1669117	71.8	191647
Campylobacter	SRR10348605	42	1670546	93.6	115363
Campylobacter	SRR10348606	29	1637465	80.4	197627
Campylobacter	SRR10348615	53	1729414	71	167883
Campylobacter	SRR10348695	91	1798373	98.9	97940
Campylobacter	SRR10348696	46	1606430	107.6	95546
Campylobacter	SRR10348699	100	1832613	110.8	77799
Campylobacter	SRR10348701	76	1752287	104.1	87552
Campylobacter	SRR10348728	81	1718698	88.9	87327
Campylobacter	SRR10349212	122	1749184	177.1	51590
Campylobacter	SRR10349481	182	1699757	41.1	24193
Campylobacter	SRR10349482	81	1685480	59.7	40535
Campylobacter	SRR10349491	89	1712524	101.1	71087
Campylobacter	SRR10349507	52	1670575	84.3	72323
Campylobacter	SRR10349512	89	1743291	79.4	82739
Campylobacter	SRR10349514	106	1824646	53.6	43157
Campylobacter	SRR10350762	54	1691022	77.1	76221
Campylobacter	SRR10350763	133	1782453	97.9	62476
Campylobacter	SRR10350770	103	1743959	91.3	68099
Campylobacter	SRR10350773	54	1768998	141.2	148149
Campylobacter	SRR10350774	52	1683641	75.1	81813
Campylobacter	SRR10350776	158	1676652	51.4	25031
Campylobacter	SRR10350777	200	1794576	64.4	32715
Campylobacter	SRR10350779	112	1729181	74.7	52418
Campylobacter	SRR10350786	44	1654143	79.9	79854
Campylobacter	SRR10350797	62	1644347	84.8	91837
Campylobacter	SRR10350801	93	1673143	98.3	51764
Campylobacter	SRR10350811	136	1680566	63.4	31620
Campylobacter	SRR10356089	80	1664564	77.1	46313
Campylobacter	SRR10356093	65	1718675	89.4	77902
Campylobacter	SRR10356097	122	1745557	49	36982
Campylobacter	SRR10356101	112	1778000	150.3	81879
Campylobacter	SRR10356109	200	1819135	78.2	43363
Campylobacter	SRR10356117	165	1806218	135.6	57545
Campylobacter	SRR10356118	56	1691201	118.6	100086
Campylobacter	SRR10357434	110	1656041	108.2	28713
Campylobacter	SRR10357486	330	1759311	96.4	14174
Campylobacter	SRR10357487	332	1841917	89	15133
Campylobacter	SRR10360287	50	1668833	90.2	84110
Campylobacter	SRR10364706	84	1824337	108.6	105177
Campylobacter	SRR10365919	59	1590845	101	67430
Campylobacter	SRR10367866	554	1741951	107.7	17616
Campylobacter	SRR10368424	63	1686869	105.6	58830
Campylobacter	SRR10375710	119	1667041	84.1	29252
Campylobacter	SRR10375728	112	1671168	88.5	27961
Campylobacter	SRR10375744	145	1703648	83.3	28314
Campylobacter	SRR10375752	179	1748633	70.6	29700
Campylobacter	SRR10375754	120	1625884	74.8	29830
Campylobacter	SRR10377215	168	1607063	98.5	23912
Campylobacter	SRR10380254	40	1708770	65.1	197657
Campylobacter	SRR10380255	34	1639427	42.9	151110
Campylobacter	SRR10380256	17	1611131	127.1	175399
Campylobacter	SRR10380265	38	1655388	114.1	118076
Campylobacter	SRR10380267	48	1714756	38.9	112553
Campylobacter	SRR10380269	77	1654168	121.7	107352
Campylobacter	SRR10380791	93	1881068	292.8	141688
Campylobacter	SRR10380811	94	1781810	141.8	67449
Campylobacter	SRR10384596	95	1709547	90.5	43585
Campylobacter	SRR10384597	51	1696451	102.6	68785
Campylobacter	SRR10384603	86	1773470	107.6	74837
Campylobacter	SRR10384610	144	1840006	100.2	70396
Campylobacter	SRR10384612	77	1702667	118	58815
Campylobacter	SRR10384894	128	1788738	101.6	36630
Campylobacter	SRR10384902	45	1725165	116.6	76522
Campylobacter	SRR10384905	131	1753126	111	50175
Campylobacter	SRR10386608	32	1646353	159.2	154339
Campylobacter	SRR10386698	90	1811454	73.2	58547
Campylobacter	SRR10386705	70	1755440	118	77556
Campylobacter	SRR10386728	55	1630907	149.7	78941
Campylobacter	SRR10386729	80	1755745	124.5	67277
Campylobacter	SRR10386743	60	1592375	77.4	78426
Campylobacter	SRR10386747	168	1686827	52.5	23678
Campylobacter	SRR10392051	43	1698720	355.2	104067
Campylobacter	SRR10395210	219	1659198	67.9	14517
Campylobacter	SRR10397484	46	1716040	64.7	138789
Campylobacter	SRR10398628	70	1669173	92.4	64686
Campylobacter	SRR10398630	76	1632290	130.1	62870
Campylobacter	SRR10398634	37	1586771	128.2	87177
Campylobacter	SRR10398636	107	1713967	127.3	46997
Campylobacter	SRR10398637	203	1806636	98.1	27256
Campylobacter	SRR10398717	107	1745498	120.4	45464
Campylobacter	SRR10399262	46	1698467	101.5	103238
Campylobacter	SRR10399265	170	1728070	41.1	27386
Campylobacter	SRR10399269	45	1625847	80.4	101927
Campylobacter	SRR10399277	34	1723928	80.5	112874
Campylobacter	SRR10399285	75	1640132	34.6	58814
Campylobacter	SRR10399290	224	1622084	34.8	15860
Campylobacter	SRR10399292	98	1749473	43.4	66267
Campylobacter	SRR10399293	106	1666272	43.2	38928
Campylobacter	SRR10399297	105	1759846	55.6	74766
Campylobacter	SRR10399299	178	1613785	52	24075
Campylobacter	SRR10399303	41	1755541	59.5	188025
Campylobacter	SRR10399304	321	1707476	43.7	12354
Campylobacter	SRR10400244	41	1692793	131.4	140886
Campylobacter	SRR10400263	38	1693768	142	130544
Campylobacter	SRR10400358	129	1861026	86.9	70677
Campylobacter	SRR10400364	183	1870892	45.9	40614
Campylobacter	SRR10403411	32	1636782	80.6	152024
Campylobacter	SRR10403413	33	1607500	56.2	175568
Campylobacter	SRR10403591	42	1637433	46.9	121362
Campylobacter	SRR10403812	63	1729083	39.6	160540
Campylobacter	SRR10403813	49	1691991	28.3	154437
Campylobacter	SRR10403814	65	1749845	30.7	128059
Campylobacter	SRR10403816	50	1725318	25.2	106837
Campylobacter	SRR10403817	66	1754492	37.5	111370
Campylobacter	SRR10403868	53	1635974	45.8	89062
Campylobacter	SRR10403869	42	1654491	52.1	100247
Campylobacter	SRR10403875	195	1612566	44.7	17741
Campylobacter	SRR10403876	191	1631566	40.8	17073
Campylobacter	SRR10403880	33	1580542	50.1	105252
Campylobacter	SRR10414491	38	1635479	104.5	128643
Campylobacter	SRR10414493	35	1601742	92.1	130289
Campylobacter	SRR10414498	29	1602853	125.4	184727
Campylobacter	SRR10414499	52	1622701	96.6	106538
Campylobacter	SRR10416867	75	1633637	141.4	39758
Campylobacter	SRR10416871	50	1629147	154.9	77295
Campylobacter	SRR10416873	220	1804102	142.5	31393
Campylobacter	SRR10416878	177	1862987	111.7	46122
Campylobacter	SRR10416888	75	1578354	116.1	46367
Campylobacter	SRR10419324	198	1753532	77.5	19997
Campylobacter	SRR10423334	79	1643737	155.7	59850
Campylobacter	SRR10423342	123	1741405	95.9	50065
Campylobacter	SRR10423348	145	1858315	89.7	69568
Campylobacter	SRR10423351	84	1748677	93.6	109746
Campylobacter	SRR10424234	74	1764792	268.5	81387
Campylobacter	SRR10424243	63	1728576	174.4	89711
Campylobacter	SRR10424245	59	1688514	119.1	163035
Campylobacter	SRR10424246	74	1663504	128.5	78569
Campylobacter	SRR10424251	70	1763679	213.3	115395
Campylobacter	SRR10424259	88	1761566	214.2	56350
Campylobacter	SRR10424262	62	1656439	385.9	67303
Campylobacter	SRR10425132	49	1686293	328.5	104045
Campylobacter	SRR10430095	67	1701541	75.9	61840
Campylobacter	SRR10431639	165	1686122	47.5	23630
Campylobacter	SRR10431642	121	1747129	64.3	27431
Campylobacter	SRR10432279	34	1638754	89.8	149485
Campylobacter	SRR10432282	36	1610029	71.6	148294
Campylobacter	SRR10435106	109	1760647	105.3	81307
Campylobacter	SRR10435116	34	1653700	149	105935
Campylobacter	SRR10435125	114	1713750	105.1	39774
Campylobacter	SRR10435130	144	1761208	132.7	60390
Campylobacter	SRR10435138	131	1703641	101.3	44866
Campylobacter	SRR10435148	103	1736962	88.8	34578
Campylobacter	SRR10435151	130	1769887	147	48557
Campylobacter	SRR10435153	222	1844210	91.3	26560
Campylobacter	SRR10435241	66	1656291	106.8	55270
Campylobacter	SRR10435246	82	1678105	94.5	54103
Campylobacter	SRR10435247	142	1763021	91.9	47913
Campylobacter	SRR10435251	148	1849417	94.9	48095
Campylobacter	SRR10435254	73	1626244	105.6	54180
Campylobacter	SRR10435256	57	1737982	115.9	76015
Campylobacter	SRR10435683	43	1619011	231.4	84492
Campylobacter	SRR10435693	69	1659177	141.2	62850
Campylobacter	SRR10435705	99	1747067	126.8	74880
Campylobacter	SRR10435716	73	1677394	187	58816
Campylobacter	SRR10435751	67	1721730	154.1	78266
Campylobacter	SRR10435773	83	1645097	219.4	45979
Campylobacter	SRR10435774	44	1644869	227.7	142566
Campylobacter	SRR10435776	78	1646604	155.8	48125
Campylobacter	SRR10435780	96	1625461	170.2	37328
Campylobacter	SRR10435784	84	1697304	149.7	69798
Campylobacter	SRR10435793	37	1608862	308.1	86699
Campylobacter	SRR10435794	45	1630173	119.3	118595
Campylobacter	SRR10435797	185	1692563	114.4	19511
Campylobacter	SRR10435801	81	1711800	158.1	78787
Campylobacter	SRR10435803	80	1730963	193.2	111099
Campylobacter	SRR10435809	67	1709995	266.3	128347
Campylobacter	SRR10435813	154	1923738	164.2	44687
Campylobacter	SRR10435817	77	1556826	203.7	66785
Campylobacter	SRR10437518	86	1760555	111.1	63008
Campylobacter	SRR10438719	194	1694064	82.5	18366
Campylobacter	SRR10438720	288	1703719	55.9	13113
Campylobacter	SRR10439658	126	1730812	122.8	44688
Campylobacter	SRR10439661	163	1824756	78.7	51069
Campylobacter	SRR10442265	27	1624711	76.1	155240
Campylobacter	SRR10442396	37	1659525	58	126159
Campylobacter	SRR10443610	86	1722726	79.4	58930
Campylobacter	SRR10444549	58	1602911	77.8	61790
Campylobacter	SRR10444564	46	1622268	76.9	79093
Campylobacter	SRR10444565	45	1677736	52.9	115450
Campylobacter	SRR10444591	70	1633932	66.5	48517
Campylobacter	SRR10446455	62	1679128	93.9	76078
Campylobacter	SRR10446479	129	1744275	114.6	74829
Campylobacter	SRR10447137	256	1847345	105.4	20020
Campylobacter	SRR10447147	128	1745064	101.3	44734
Campylobacter	SRR10447199	83	1745565	91.6	84115
Campylobacter	SRR10447229	114	1869303	104	92114
Campylobacter	SRR10447233	91	1804645	117.6	106391
Campylobacter	SRR10447349	91	1710376	77.6	51249
Campylobacter	SRR10447351	126	1768111	56.9	41788
Campylobacter	SRR10447356	140	1750896	64.1	71506
Campylobacter	SRR10447357	87	1804742	141.1	99331
Campylobacter	SRR10465709	41	1654031	99.5	84011
Campylobacter	SRR10465766	134	1834745	97.2	62628
Campylobacter	SRR10465767	36	1626179	105.2	129106
Campylobacter	SRR10466049	111	1875881	139	87440
Campylobacter	SRR10466050	110	1859168	92.2	128911
Campylobacter	SRR10466051	42	1669102	82.7	121883
Campylobacter	SRR10467362	57	1652263	133.7	60846
Campylobacter	SRR10467387	55	1668777	122.4	123987
Campylobacter	SRR10467389	107	1742366	144.1	40572
Campylobacter	SRR10467391	62	1727683	99.1	60545
Campylobacter	SRR10467404	73	1746350	123.7	94390
Campylobacter	SRR10479238	82	1652658	68.2	44373
Campylobacter	SRR10482439	70	1659538	144.9	62169
Campylobacter	SRR10482484	117	1745562	113.8	48844
Campylobacter	SRR10482652	39	1635601	37	128642
Campylobacter	SRR10490230	69	1683051	207.2	65983
Campylobacter	SRR10490233	61	1646234	151	49961
Campylobacter	SRR10490239	64	1689024	130.1	67346
Campylobacter	SRR10490241	76	1756310	125.7	67086
Campylobacter	SRR10490243	97	1611807	229.2	131271
Campylobacter	SRR10490245	83	1679258	144.3	64227
Campylobacter	SRR10490246	57	1644383	259.1	70916
Campylobacter	SRR10490265	58	1648397	151.4	71223
Campylobacter	SRR10490266	225	1628731	141.5	13925
Campylobacter	SRR10490268	37	1626046	212.6	85716
Campylobacter	SRR10490270	58	1644995	111.1	78014
Campylobacter	SRR10490420	45	1643110	215.4	87072
Campylobacter	SRR10490449	50	1655719	73	89101
Campylobacter	SRR10490503	41	1703412	89.1	155261
Campylobacter	SRR10490514	46	1622424	91.9	106403
Campylobacter	SRR10490515	44	1699541	45.8	111587
Campylobacter	SRR10490520	34	1676594	66.6	197591
Campylobacter	SRR10499149	25	1630303	238.7	108784
Campylobacter	SRR10500149	107	1750044	166.7	57206
Campylobacter	SRR10500150	165	1671405	193.4	26565
Campylobacter	SRR10500153	72	1655111	182.6	61879
Campylobacter	SRR10500326	36	1636250	55.3	184824
Campylobacter	SRR10500327	57	1707811	61.3	118125
Campylobacter	SRR10500331	37	1615386	51.8	135390
Campylobacter	SRR10500337	50	1674964	60.7	154010
Campylobacter	SRR10500338	59	1732235	59	118200
Campylobacter	SRR10500342	34	1598588	66.4	183847
Campylobacter	SRR10500375	48	1701691	226.4	100501
Campylobacter	SRR10500376	62	1709617	241	78475
Campylobacter	SRR10503757	66	1606974	103.3	85365
Campylobacter	SRR10503759	81	1727572	103.5	75301
Campylobacter	SRR10503760	69	1697072	84.7	75949
Campylobacter	SRR10503764	123	1783671	108	55293
Campylobacter	SRR10503766	113	1782051	101.9	60218
Campylobacter	SRR10503778	39	1630750	118.7	115185
Campylobacter	SRR10503779	74	1779476	131.8	95797
Campylobacter	SRR10503783	67	1748360	83	77417
Campylobacter	SRR10503788	125	1837793	103.5	82836
Campylobacter	SRR10505252	40	1601789	44.1	119429
Campylobacter	SRR10505490	109	1695565	40.1	43602
Campylobacter	SRR10506394	27	1748499	123.7	232340
Campylobacter	SRR10506414	53	1762888	59.3	148240
Campylobacter	SRR10506419	108	1853892	124.4	142060
Campylobacter	SRR10506424	48	1649460	43.8	119128
Campylobacter	SRR10506426	38	1570060	53.1	145429
Campylobacter	SRR10506430	35	1615549	172	137270
Campylobacter	SRR10506431	28	1589115	43.5	183952
Campylobacter	SRR10506432	43	1649056	64.4	121611
Campylobacter	SRR10506433	40	1681112	56.1	139845
Campylobacter	SRR10506440	34	1624955	40.3	153459
Campylobacter	SRR10506443	38	1635538	43.6	160433
Campylobacter	SRR10506448	169	1711967	114	29314
Campylobacter	SRR10506453	75	1691839	321.9	60838
Campylobacter	SRR10513038	54	1658077	46.3	160471
Campylobacter	SRR10513045	68	1717957	40.1	160648
Campylobacter	SRR10513058	36	1669533	69.1	154775
Campylobacter	SRR10513289	94	1666836	99.8	35360
Campylobacter	SRR10513299	150	1792127	235.5	71348
Campylobacter	SRR10513320	265	1845454	324.4	26994
Campylobacter	SRR10513646	37	1634506	134.1	197626
Campylobacter	SRR10517384	94	1663297	74.8	42310
Campylobacter	SRR10517386	104	1724624	113.2	48128
Campylobacter	SRR10517418	124	1701906	95.8	41160
Campylobacter	SRR10517467	183	1638345	60.4	17170
Campylobacter	SRR10517468	129	1661723	83.8	30882
Campylobacter	SRR10517470	90	1749395	122.1	48979
Campylobacter	SRR10517472	111	1673911	82.5	41952
Campylobacter	SRR10521984	53	1748700	157.8	129997
Campylobacter	SRR10524156	65	1753046	62.5	104055
Campylobacter	SRR10524158	59	1837712	98.8	157351
Campylobacter	SRR10524160	91	1788888	66.2	83501
Campylobacter	SRR10530284	94	1765607	71.7	50667
Campylobacter	SRR10530293	85	1766389	77.3	76539
Campylobacter	SRR10530299	43	1669520	131.8	177977
Campylobacter	SRR10530325	152	1913997	77.6	46800
Campylobacter	SRR10530326	51	1706909	85.6	130413
Campylobacter	SRR10532151	39	1845403	79.7	154037
Campylobacter	SRR10532702	36	1685368	57.8	160433
Campylobacter	SRR10532703	36	1684957	57.1	128643
Campylobacter	SRR10532706	37	1686563	82.2	121366
Campylobacter	SRR10533323	69	1593217	308.5	62586
Campylobacter	SRR10534678	54	1779623	58.8	173614
Campylobacter	SRR10535031	70	1714508	29	76023
Campylobacter	SRR10535884	22	1711291	59.1	150068
Campylobacter	SRR10535888	70	1710805	56	103935
Campylobacter	SRR10535889	38	1652567	67.2	153719
Campylobacter	SRR10536680	59	1718009	105.4	128285
Campylobacter	SRR10536681	31	1673284	94.9	166850
Campylobacter	SRR10536684	39	1745774	84.7	153798
Campylobacter	SRR10546706	103	1741280	114.9	47817
Campylobacter	SRR10546707	325	1640540	54.5	10685
Campylobacter	SRR10546744	209	1705045	67.8	15741
Campylobacter	SRR10546781	97	1671264	98.9	50848
Campylobacter	SRR10546790	246	1654240	63.5	13780
Campylobacter	SRR10557792	50	1701023	107.4	150343
Campylobacter	SRR10557795	26	1757133	132.7	178110
Campylobacter	SRR10557799	43	1659049	122.5	125307
Campylobacter	SRR10557800	61	1673550	95.2	122323
Campylobacter	SRR10557801	47	1638923	129.8	148518
Campylobacter	SRR10557809	38	1674507	122.8	139833
Campylobacter	SRR10557810	46	1685146	103.8	111157
Campylobacter	SRR10558069	53	1711136	184.5	119045
Campylobacter	SRR10571006	214	1617028	37.7	14266
Campylobacter	SRR10574660	208	1848885	101.7	28247
Campylobacter	SRR10574702	142	1779167	81.3	30809
Campylobacter	SRR10574706	56	1644268	90.4	76705
Campylobacter	SRR10574714	127	1746611	93.1	45405
Campylobacter	SRR10574717	71	1659795	91.6	50864
Campylobacter	SRR10574719	41	1705107	131.9	99544
Campylobacter	SRR10574720	168	1750789	59.2	27058
Campylobacter	SRR10574724	65	1751124	149.4	112290
Campylobacter	SRR10574774	64	1722378	103	78820
Campylobacter	SRR10574778	48	1597288	105.5	84375
Campylobacter	SRR10574779	37	1656277	145.2	124608
Campylobacter	SRR10574780	29	1635345	154.9	111595
Campylobacter	SRR10574781	51	1682447	109.6	132547
Campylobacter	SRR10574783	94	1669222	71.2	40196
Campylobacter	SRR10574788	58	1783590	179.2	163714
Campylobacter	SRR10574790	54	1655287	132.3	103322
Campylobacter	SRR10574794	80	1711501	106.9	74688
Campylobacter	SRR10574811	39	1649827	68	89162
Campylobacter	SRR10574814	95	1684305	80.1	54907
Campylobacter	SRR10574826	89	1764312	96.7	65949
Campylobacter	SRR10574890	98	1792270	131.5	86656
Campylobacter	SRR10574919	61	1725841	108.1	118676
Campylobacter	SRR10574978	111	1852574	91	114935
Campylobacter	SRR10575019	34	1709849	167	137920
Campylobacter	SRR10575020	65	1659292	97.6	67170
Campylobacter	SRR10575021	51	1684467	119.9	161301
Campylobacter	SRR10575022	114	1791870	150.2	86718
Campylobacter	SRR10575029	83	1816592	91.7	65039
Campylobacter	SRR10575034	94	1758260	94.5	81140
Campylobacter	SRR10579057	34	1585021	107.6	134069
Campylobacter	SRR10579063	93	1711420	61.5	46662
Campylobacter	SRR10579066	119	1650170	85.8	39373
Campylobacter	SRR10579791	101	1664237	83.3	41383
Campylobacter	SRR10579888	121	1777919	59.4	38471
Campylobacter	SRR10579892	62	1669591	95.9	82618
Campylobacter	SRR10579900	37	1660745	103	83853
Campylobacter	SRR10580011	143	1613300	81	23114
Campylobacter	SRR10580532	139	1746007	74.8	31795
Campylobacter	SRR10580548	81	1700959	127.2	58047
Campylobacter	SRR10582243	84	1814499	171.8	76970
Campylobacter	SRR10582262	63	1668807	135.1	57466
Campylobacter	SRR10582803	128	1658365	89.6	29877
Campylobacter	SRR10582829	242	1723349	66.6	21262
Campylobacter	SRR10582830	82	1674824	102.1	54186
Campylobacter	SRR10582834	137	1751750	80.4	34930
Campylobacter	SRR10582844	73	1719217	109.1	63607
Campylobacter	SRR10586090	72	1820852	103.4	111142
Campylobacter	SRR10593033	84	1854663	118.2	107600
Campylobacter	SRR10593907	122	1711368	116.5	46243
Campylobacter	SRR10593927	144	1791549	179.9	116941
Campylobacter	SRR10593931	51	1720973	300.8	141457
Campylobacter	SRR10593934	64	1692155	426	83423
Campylobacter	SRR10593938	95	1597675	108.7	36258
Campylobacter	SRR10600012	39	1634850	37	160433
Campylobacter	SRR10603305	78	1688204	132.7	61509
Campylobacter	SRR10603308	160	1813421	111.7	55034
Campylobacter	SRR10603351	122	1768010	134.3	79558
Campylobacter	SRR10603402	55	1661429	119.5	78130
Campylobacter	SRR10603403	139	1847628	104.9	62978
Campylobacter	SRR10603407	86	1747569	110.7	78834
Campylobacter	SRR10603412	70	1682173	147.8	107047
Campylobacter	SRR10603420	44	1718878	109.3	71004
Campylobacter	SRR10604385	48	1600166	159.2	80496
Campylobacter	SRR10607615	176	1723237	40.6	28712
Campylobacter	SRR10607616	52	1696973	53.6	95883
Campylobacter	SRR10609006	61	1760466	60.8	93383
Campylobacter	SRR10609010	36	1707515	100	160492
Campylobacter	SRR10609015	21	1666586	65.3	147413
Campylobacter	SRR10609600	82	1760944	57.5	160496
Campylobacter	SRR10611492	106	1745833	87	52098
Campylobacter	SRR10612120	117	1777052	79	87350
Campylobacter	SRR10612127	65	1782026	92.4	102627
Campylobacter	SRR10612134	91	1779035	113.5	87542
Campylobacter	SRR10612139	67	1616688	77.8	67320
Campylobacter	SRR10612144	78	1669096	70.7	51657
Campylobacter	SRR10612148	129	1761594	110.3	60398
Campylobacter	SRR10612150	177	1714076	76.6	24379
Campylobacter	SRR10612173	77	1694006	86.3	91613
Campylobacter	SRR10612194	70	1678903	81.7	67779
Campylobacter	SRR10612202	69	1744249	89.4	78853
Campylobacter	SRR10612203	49	1668816	117.5	123887
Campylobacter	SRR10612214	129	1782115	83.6	51548
Campylobacter	SRR10612216	147	1856072	104.5	54096
Campylobacter	SRR10612220	120	1747850	73.6	48780
Campylobacter	SRR10612222	130	1850408	92.2	52564
Campylobacter	SRR10612227	110	1762679	94.1	52107
Campylobacter	SRR10612228	82	1774911	121.9	68439
Campylobacter	SRR10612234	123	1668634	74.6	31221
Campylobacter	SRR10612239	80	1746319	108.6	68801
Campylobacter	SRR10612240	105	1745159	98.2	47010
Campylobacter	SRR10612317	61	1698983	110.2	85591
Campylobacter	SRR10615146	223	1841901	74.3	26487
Campylobacter	SRR10615147	119	1633774	79.7	30661
Campylobacter	SRR10615150	163	1674773	66.3	24380
Campylobacter	SRR10615152	153	1673158	86.9	26542
Campylobacter	SRR10615156	93	1620840	90.5	37384
Campylobacter	SRR10615594	31	1635091	365.4	186188
Campylobacter	SRR10615600	34	1637316	244.2	197628
Campylobacter	SRR10617561	71	1696728	50.8	128658
Campylobacter	SRR10619383	101	1751168	69	112031
Campylobacter	SRR10619384	27	1721046	82.3	158814
Campylobacter	SRR10665939	50	1661249	68.8	140853
Campylobacter	SRR10665943	82	1856977	27.2	85225
Campylobacter	SRR10666918	67	1735512	39.6	99940
Campylobacter	SRR10666932	72	1680301	34	133027
Campylobacter	SRR10666934	35	1623636	61.4	127617
Campylobacter	SRR10666940	49	1743424	40	146970
Campylobacter	SRR10666941	77	1736873	55	111088
Campylobacter	SRR10674371	29	1658072	39.1	142371
Campylobacter	SRR10674372	62	1752376	145.6	98591
Campylobacter	SRR10674377	58	1734934	92.4	93774
Campylobacter	SRR10674381	59	1784724	181.8	148824
Campylobacter	SRR10674382	234	1738706	183.8	19521
Campylobacter	SRR10689844	93	1689047	105.8	33542
Campylobacter	SRR10689857	275	1699981	62.4	13517
Campylobacter	SRR10689941	99	1667183	94.5	41617
Campylobacter	SRR10690369	48	1735355	103.4	116358
Campylobacter	SRR10691760	149	1860550	88.5	48416
Campylobacter	SRR10691764	173	1739758	54.5	24376
Campylobacter	SRR10691765	110	1728226	104.4	106511
Campylobacter	SRR10691775	187	1748026	104.7	30754
Campylobacter	SRR10691776	243	1728816	129.6	17972
Campylobacter	SRR10691784	65	1669197	90.9	43241
Campylobacter	SRR10691785	75	1736323	127.8	62439
Campylobacter	SRR10692942	225	1771629	104.8	28120
Campylobacter	SRR10695695	107	1644687	58.4	31886
Campylobacter	SRR10695720	114	1637039	62.2	38877
Campylobacter	SRR10699556	31	1696106	83.4	130281
Campylobacter	SRR10699559	44	1628496	75.6	115495
Campylobacter	SRR10699560	23	1656093	52.2	167272
Campylobacter	SRR10699562	40	1629040	103.2	115456
Campylobacter	SRR10699564	46	1688896	66.4	156267
Campylobacter	SRR10699575	35	1690345	95	140928
Campylobacter	SRR10699579	41	1632173	86	146229
Campylobacter	SRR10699585	40	1658039	72.7	160471
Campylobacter	SRR10708464	98	1771507	137.8	148898
Campylobacter	SRR10708487	134	1790926	73.5	52810
Campylobacter	SRR10708513	163	1747888	110.9	66396
Campylobacter	SRR10717574	24	1654433	47.5	142206
Campylobacter	SRR10718207	37	1637093	138.7	156105
Campylobacter	SRR10718217	52	1759504	115.4	186492
Campylobacter	SRR10718318	45	1687642	49.1	154035
Campylobacter	SRR10718343	32	1637795	257.3	116394
Campylobacter	SRR10718348	39	1656300	52.3	159489
Campylobacter	SRR10719501	83	1745544	62.3	65320
Campylobacter	SRR10723156	77	1740996	104.3	86049
Campylobacter	SRR10723178	92	1652902	140.2	33988
Campylobacter	SRR10723182	44	1664148	127.3	106124
Campylobacter	SRR10723218	91	1723302	157.8	58684
Campylobacter	SRR10723721	30	1637406	142.7	197676
Campylobacter	SRR10723823	27	1671398	85.4	358421
Campylobacter	SRR10728989	218	1764431	61.4	24930
Campylobacter	SRR10728990	48	1621394	91.3	86183
Campylobacter	SRR10729074	97	1630102	134.6	32147
Campylobacter	SRR10734045	51	1655680	114	68600
Campylobacter	SRR10734046	36	1657777	140.7	103410
Campylobacter	SRR10734236	182	1880418	91.7	52489
Campylobacter	SRR10734242	113	1761001	89	70716
Campylobacter	SRR10734245	126	1712792	71.4	34867
Campylobacter	SRR10734253	139	1755759	139.6	31281
Campylobacter	SRR10734260	180	1754406	89.6	28549
Campylobacter	SRR10734267	78	1753721	109.8	75969
Campylobacter	SRR10738396	88	1704807	162.1	46905
Campylobacter	SRR10738409	60	1722910	212	177560
Campylobacter	SRR10738411	38	1638374	88.4	153170
Campylobacter	SRR10738420	48	1730954	176.1	80310
Campylobacter	SRR10738421	71	1798826	102	73721
Campylobacter	SRR10738422	44	1665827	116.9	92488
Campylobacter	SRR10738504	42	1653532	144.3	97501
Campylobacter	SRR10738508	48	1695280	172.1	79011
Campylobacter	SRR10738510	36	1668767	157.2	112592
Campylobacter	SRR10738512	46	1576166	147.3	78514
Campylobacter	SRR10738517	53	1739830	134.2	143943
Campylobacter	SRR10741824	77	1702530	97	86047
Campylobacter	SRR10746209	56	1780076	69.6	119566
Campylobacter	SRR10746218	62	1734569	38.5	181666
Campylobacter	SRR10746223	32	1627066	32.5	135444
Campylobacter	SRR10746224	36	1600691	37.3	129184
Campylobacter	SRR10747832	134	1731025	79	66114
Campylobacter	SRR10747836	57	1755231	38.9	127449
Campylobacter	SRR10747847	70	1766862	48.7	76229
Campylobacter	SRR10747851	85	1607954	40.6	46121
Campylobacter	SRR10747852	104	1776614	62.5	114527
Campylobacter	SRR10747859	139	1663819	38.1	30820
Campylobacter	SRR10747869	77	1675488	48.7	67521
Campylobacter	SRR10748596	32	1645340	153.2	213052
Campylobacter	SRR10748607	28	1590133	166.1	183962
Campylobacter	SRR10748613	134	1703543	26.2	24237
Campylobacter	SRR10748617	36	1639113	121.3	151071
Campylobacter	SRR10748619	71	1759706	148.1	148150
Campylobacter	SRR10748639	50	1716365	223.9	135932
Campylobacter	SRR10748642	55	1756943	196.9	155504
Campylobacter	SRR10748645	42	1664630	121.6	154042
Campylobacter	SRR10748698	78	1672627	258.2	83038
Campylobacter	SRR10748726	67	1665452	268.9	62625
Campylobacter	SRR10749189	36	1624512	104.7	154431
Campylobacter	SRR10749191	44	1628272	127.5	115495
Campylobacter	SRR10749194	34	1602514	105.9	151175
Campylobacter	SRR10749198	45	1622858	145.7	111308
Campylobacter	SRR10749200	35	1695839	82.5	154438
Campylobacter	SRR10749206	57	1687860	83.2	154487
Campylobacter	SRR10749210	43	1682584	93.2	164640
Campylobacter	SRR10749211	53	1676676	88.8	140664
Campylobacter	SRR10749214	43	1674001	111.9	197352
Campylobacter	SRR10758597	203	1836065	93.7	34998
Campylobacter	SRR10758599	143	1870080	102.4	58816
Campylobacter	SRR10758601	114	1774137	88.7	61955
Campylobacter	SRR10758602	76	1632003	142	46811
Campylobacter	SRR10758603	125	1751029	111.8	40055
Campylobacter	SRR10758604	90	1765231	84.5	69867
Campylobacter	SRR10758612	139	1894543	110.9	72469
Campylobacter	SRR10758618	62	1664359	111	80877
Campylobacter	SRR10758619	100	1742115	126.6	59960
Campylobacter	SRR10758626	120	1766883	113.3	51907
Campylobacter	SRR10758698	356	1669178	67.1	10416
Campylobacter	SRR10758699	147	1704935	113.1	30345
Campylobacter	SRR10758717	43	1694336	50.5	128619
Campylobacter	SRR10758724	57	1695481	51.3	79053
Campylobacter	SRR10758756	116	1853758	109.6	87735
Campylobacter	SRR10761774	26	1721499	90.7	158725
Campylobacter	SRR10763391	32	1724111	67	154635
Campylobacter	SRR10763393	36	1619884	83.8	189906
Campylobacter	SRR10763394	39	1674967	112.9	115068
Campylobacter	SRR10768367	120	1667041	65.1	30738
Campylobacter	SRR10768369	31	1755149	36.3	213184
Campylobacter	SRR10768384	40	1669653	265.1	155043
Campylobacter	SRR10768722	122	1666869	100.5	33324
Campylobacter	SRR10769143	340	1889120	101.3	68884
Campylobacter	SRR10771527	130	1694226	75.4	36700
Campylobacter	SRR10771529	194	1767861	76	22851
Campylobacter	SRR10803554	41	1636883	41.9	126809
Campylobacter	SRR10803557	36	1595641	37.8	148230
Campylobacter	SRR10803567	68	1631536	18.1	91086
Campylobacter	SRR10803569	63	1699298	23.8	105219
Campylobacter	SRR10803571	66	1724994	39.9	133555
Campylobacter	SRR10803572	50	1643829	42.7	126809
Campylobacter	SRR10803573	26	1596500	40.2	183841
Campylobacter	SRR10804325	95	1795590	109.6	44677
Campylobacter	SRR10804963	242	1551953	36.8	11680
Campylobacter	SRR10804967	66	1720469	53.6	99522
Campylobacter	SRR10804971	54	1699388	64.7	96283
Campylobacter	SRR10804974	46	1699402	58.3	78722
Campylobacter	SRR10804976	44	1605309	69.7	109963
Campylobacter	SRR10806312	96	1639414	65.2	67252
Campylobacter	SRR10806314	99	1625764	81.4	44582
Campylobacter	SRR10810185	60	1734304	135.9	114148
Campylobacter	SRR10810705	73	1674772	208.3	138330
Campylobacter	SRR10810706	64	1648929	224.5	78430
Campylobacter	SRR10810709	94	1721547	173.5	48756
Campylobacter	SRR10810710	62	1674287	195.4	81591
Campylobacter	SRR10814957	186	1819954	179.1	28932
Campylobacter	SRR10815074	40	1636604	132.9	121354
Campylobacter	SRR10815081	53	1777376	74.2	154516
Campylobacter	SRR10815165	50	1724221	113	159306
Campylobacter	SRR10815174	25	1607162	119.7	177123
Campylobacter	SRR10815578	135	1775733	146.5	71988
Campylobacter	SRR10815593	85	1674715	110.8	31498
Campylobacter	SRR10815619	243	1681692	64	16201
Campylobacter	SRR10815630	131	1810753	105.8	65069
Campylobacter	SRR10815635	111	1703616	105	35872
Campylobacter	SRR10815891	24	1653151	73.5	146761
Campylobacter	SRR10815895	39	1699848	88.2	106404
Campylobacter	SRR10815899	40	1659474	66.9	106365
Campylobacter	SRR10815900	40	1636571	69.3	128649
Campylobacter	SRR10815904	41	1600432	67.3	134552
Campylobacter	SRR10815906	41	1631846	64.7	151289
Campylobacter	SRR10820709	71	1632079	96.6	54535
Campylobacter	SRR10820811	45	1739890	99.2	160575
Campylobacter	SRR10820813	76	1696606	81.6	115141
Campylobacter	SRR10820814	48	1749016	100.9	139353
Campylobacter	SRR10822412	60	1720976	29.6	121824
Campylobacter	SRR10822420	61	1675003	25.5	114255
Campylobacter	SRR10822422	32	1674423	86.7	128591
Campylobacter	SRR10822426	41	1692819	42.5	150273
Campylobacter	SRR10822756	37	1597410	94.9	140727
Campylobacter	SRR10824136	164	1792127	62.6	30989
Campylobacter	SRR10824142	57	1689985	109.8	154438
Campylobacter	SRR10824144	212	1759000	58.5	30883
Campylobacter	SRR10824158	215	1822681	87.2	24251
Campylobacter	SRR10824159	184	1838584	96.6	46366
Campylobacter	SRR10828961	30	1675892	169	208547
Campylobacter	SRR10828963	42	1725074	86.4	193869
Campylobacter	SRR1723386	1331	1430019	12.4	1597
Campylobacter	SRR1723395	1440	1422319	12.9	1447
Campylobacter	SRR1723397	1632	1426083	12.7	1260
Campylobacter	SRR1724223	1623	1476564	11.5	1305
Campylobacter	SRR1724280	40	1578411	162.9	120516
Campylobacter	SRR1768073	45	1661942	130.7	91998
Campylobacter	SRR1769031	58	1724065	116	100184
Campylobacter	SRR1769302	60	1795306	148.9	129639
Campylobacter	SRR1769865	169	1800855	47.4	49873
Campylobacter	SRR1772863	39	1638304	85.1	119239
Campylobacter	SRR1794069	100	1681266	99.3	31921
Campylobacter	SRR1794072	281	1868426	82	23372
Campylobacter	SRR1794077	107	1603419	96.2	37994
Campylobacter	SRR1794080	93	1708728	132.5	65986
Campylobacter	SRR1811822	33	1646084	105.3	184088
Campylobacter	SRR1814852	57	1775808	180.7	140845
Campylobacter	SRR1815345	99	1892527	147.7	99655
Campylobacter	SRR1815397	63	1742926	187.5	88651
Campylobacter	SRR1815400	69	1765720	135.5	130915
Campylobacter	SRR1816155	31	1639684	216.7	155006
Campylobacter	SRR1816157	41	1600677	238.6	129110
Campylobacter	SRR1816160	84	1743481	76.7	96539
Campylobacter	SRR1816167	26	1608432	54.9	129174
Campylobacter	SRR1816168	49	1720776	125.3	128338
Campylobacter	SRR1816169	48	1639487	122.5	142748
Campylobacter	SRR1816172	32	1591979	76.4	129056
Campylobacter	SRR1816176	79	1699005	81.4	119427
Campylobacter	SRR1816185	83	1725410	130.3	128953
Campylobacter	SRR1816187	36	1655413	166.1	160353
Campylobacter	SRR1816189	63	1628292	332.6	117484
Campylobacter	SRR1816190	103	1767315	90.5	94580
Campylobacter	SRR1816198	64	1785139	128	113273
Campylobacter	SRR1816211	33	1588419	235.4	134037
Campylobacter	SRR1816214	44	1669197	160.9	115133
Campylobacter	SRR1816218	44	1643037	183.3	152817
Campylobacter	SRR1816220	48	1642888	223.9	138718
Campylobacter	SRR1816222	69	1745111	211.7	110394
Campylobacter	SRR1816232	63	1686391	67.3	127824
Campylobacter	SRR1816233	41	1718994	74.4	144262
Campylobacter	SRR1816234	48	1732096	132.8	127634
Campylobacter	SRR1816236	42	1553461	83.5	115844
Campylobacter	SRR1816237	71	1705242	45.2	128403
Campylobacter	SRR1816250	51	1622764	134.3	145508
Campylobacter	SRR1816254	33	1624886	115.3	183958
Campylobacter	SRR1816259	94	1853802	85.3	116896
Campylobacter	SRR1816274	35	1716674	73.6	183950
Campylobacter	SRR1816278	54	1687319	55.5	111537
Campylobacter	SRR1816283	40	1598142	86.2	160226
Campylobacter	SRR1816287	50	1617742	55.4	154039
Campylobacter	SRR1816292	44	1620729	92.4	154036
Campylobacter	SRR1816296	69	1704700	417.5	112672
Campylobacter	SRR1816297	29	1590280	152.1	149565
Campylobacter	SRR1816301	31	1590806	301	183917
Campylobacter	SRR1816313	22	1729085	371.1	163565
Campylobacter	SRR1816314	91	1782062	194.5	91099
Campylobacter	SRR1816315	33	1646475	192.2	137693
Campylobacter	SRR1816321	60	1786193	328.1	167535
Campylobacter	SRR1816322	88	1661896	149	104056
Campylobacter	SRR1816356	52	1745773	118.6	121635
Campylobacter	SRR1816364	77	1715632	219.7	139107
Campylobacter	SRR1816365	25	1606331	287.1	121105
Campylobacter	SRR1816368	39	1642470	153.6	129266
Campylobacter	SRR1816643	61	1674704	102.9	110362
Campylobacter	SRR1816644	75	1800906	142.3	174273
[truncated: 49,415 more rows]
